# Supplementary material for: Zinc(ii) Schiff base complexes as dual probes for the detection of NH4+ and HPO42− ions
Source: Royal Society of Chemistry journal article supplement (doi:10.1039/d2nj01686a), 2022-01-01
Supplement: d2nj01686a1.pdf [file d2nj01686a1.pdf]

## Supporting Information

*Li Yan,<sup>1, a, b</sup> Zhongkui Li,<sup>1, a</sup> Yan Xiong<sup>b</sup>, Xue Zhong,<sup>a</sup> Shaochun Peng<sup>b</sup> and Hui Li<sup>a, \*</sup>*

<sup>a</sup> School of Chemistry and Chemical Engineering, Beijing Institute of Technology, Beijing 102488, P. R. China

<sup>b</sup> Analysis & Testing Center of Beijing Institute of Technology, Liangxiang Campus, Liangxiang East Road, Beijing 102488, P. R. China

<sup>1</sup> Li Yan and Zhongkui Li contribute equally to the article.

\*E-mail: [lihui@bit.edu.cn](mailto:lihui@bit.edu.cn)

# Contents

|                                                                                                                                                                                                                                                                                                                                                                                                                         |    |
|-------------------------------------------------------------------------------------------------------------------------------------------------------------------------------------------------------------------------------------------------------------------------------------------------------------------------------------------------------------------------------------------------------------------------|----|
| <b>Fig S1.</b> FT-IR spectra of <b>NaHL</b> , <b>1</b> , <b>2</b> , and <b>3</b> .....                                                                                                                                                                                                                                                                                                                                  | 4  |
| <b>Fig S2.</b> <sup>1</sup> H NMR spectrum (700 MHz, 298K) of <b>NaHL</b> in DMSO- <i>d</i> <sub>6</sub> .....                                                                                                                                                                                                                                                                                                          | 4  |
| <b>Fig S3.</b> <sup>1</sup> H NMR spectrum (700 MHz, 298K) of <b>1</b> and <b>2</b> in DMSO- <i>d</i> <sub>6</sub> .....                                                                                                                                                                                                                                                                                                | 5  |
| <b>Fig S4.</b> <sup>1</sup> H NMR spectrum (700 MHz, 298K) of <b>3</b> in DMSO- <i>d</i> <sub>6</sub> .....                                                                                                                                                                                                                                                                                                             | 5  |
| <b>Fig S5.</b> Oak Ridge thermal ellipsoid plot (ORTEP) views of <b>1</b> (a), <b>2</b> (b), and <b>3</b> (c) with 50% thermal ellipsoid probability.....                                                                                                                                                                                                                                                               | 6  |
| <b>Fig S6.</b> One-dimensional helix chain structure of <b>1</b> .....                                                                                                                                                                                                                                                                                                                                                  | 6  |
| <b>Fig S7.</b> 2D structure of <b>1</b> viewed from <i>c</i> axis (a) and <i>a</i> axis (b).....                                                                                                                                                                                                                                                                                                                        | 7  |
| <b>Fig S8.</b> 3D structure of <b>1</b> viewed from <i>a</i> axis (a) and <i>b</i> axis (b).....                                                                                                                                                                                                                                                                                                                        | 7  |
| <b>Fig S9.</b> 2D structure of <b>2</b> viewed from <i>b</i> axis (a); 3D structure of <b>2</b> viewed from <i>a</i> axis (b)....                                                                                                                                                                                                                                                                                       | 8  |
| <b>Fig S10.</b> 2D structure of <b>3</b> viewed from <i>a</i> axis (a); 2D layered structure of <b>3</b> viewed from <i>b</i> axis (b).....                                                                                                                                                                                                                                                                             | 8  |
| <b>Fig S11.</b> 3D structure of <b>3</b> viewed from <i>b</i> axis (a), from <i>c</i> axis (b).....                                                                                                                                                                                                                                                                                                                     | 9  |
| <b>Fig S12.</b> The bending angle between the pyridine ligand benzene ring and the benzene ring is 15.584°.....                                                                                                                                                                                                                                                                                                         | 9  |
| <b>Fig S13.</b> PXRD spectra of <b>1</b> (a), <b>2</b> (b) and <b>3</b> (c).....                                                                                                                                                                                                                                                                                                                                        | 10 |
| <b>Fig. S14.</b> TG curves of <b>1</b> , <b>2</b> and <b>3</b> . The losses of <b>1</b> , <b>2</b> , <b>3</b> in the first stage were 5.8%, 23.97 % and 6 % respectively.....                                                                                                                                                                                                                                           | 10 |
| <b>Fig S15.</b> UV-vis spectra changes of <b>NaHL</b> (1×10 <sup>-5</sup> mol L <sup>-1</sup> ) after addition of Zn <sup>2+</sup> (0–2.0 equiv) in ethanol.....                                                                                                                                                                                                                                                        | 11 |
| <b>Fig S16.</b> Fluorescence spectra of <b>NaHL</b> , <b>1</b> , <b>2</b> , and <b>3</b> in CH <sub>3</sub> CN (a) and CH <sub>2</sub> Cl <sub>2</sub> (b) (E <sub>x</sub> = 360 nm and concentration of 2.5×10 <sup>-5</sup> mol L <sup>-1</sup> ).....                                                                                                                                                                | 11 |
| <b>Fig S17.</b> Fluorescence spectrum changes of <b>NaHL</b> (The concentration of 2.5×10 <sup>-5</sup> mol L <sup>-1</sup> ) upon addition of Zn <sup>2+</sup> (The concentration of 2.5×10 <sup>-3</sup> mol L <sup>-1</sup> ) in ethanol (E <sub>x</sub> = 360 nm, pass widths 2.5 nm).....                                                                                                                          | 12 |
| <b>Fig S18.</b> <sup>1</sup> H NMR (DMSO- <i>d</i> <sub>6</sub> , 700 MHz) spectra changes of <b>NaHL</b> upon addition of Zn <sup>2+</sup> (0–2 eq).....                                                                                                                                                                                                                                                               | 12 |
| <b>Fig S19.</b> Primary orbitals which contribute to the calculated transitions of <b>NaHL</b> and complex <b>1-3</b> (iso=0.01).....                                                                                                                                                                                                                                                                                   | 13 |
| <b>Fig S20.</b> Optimized corresponding structure of complex <b>1</b> at the B3LYP(D3BJ)/6-31G(d)/SDD level (distances in Å) and the Color-filled (a) Reduced density gradient (RDG).....                                                                                                                                                                                                                               | 13 |
| <b>Fig S21.</b> Fluorescence titration curves of complex <b>1</b> (a, c) and complex <b>2</b> (b, d) in the presence of different concentrations of NH <sub>4</sub> <sup>+</sup> /HPO <sub>4</sub> <sup>2-</sup> . The linear correlation for the <b>1/2</b> and NH <sub>4</sub> <sup>+</sup> /HPO <sub>4</sub> <sup>2-</sup> concentration at low concentration range (insert).....                                    | 14 |
| <b>Fig S22.</b> selectivity of NH <sub>4</sub> <sup>+</sup> /HPO <sub>4</sub> <sup>2-</sup> (4.0 equiv.) to other competing ions of <b>1</b> under UV lamp (365 nm) (a) and (b); (c) and (d) Selectivity of NH <sub>4</sub> <sup>+</sup> /HPO <sub>4</sub> <sup>2-</sup> (4.0 equiv.) to other competing ions of <b>2</b> under UV lamp (365 nm).....                                                                   | 14 |
| <b>Fig S23</b> (a) and (b) Fluorescence spectra changes of <b>1,2</b> (2.5×10 <sup>-5</sup> mol L <sup>-1</sup> ) up addition of H <sup>+</sup> (0–4.0 equiv) in ethanol. (c) Fluorescence spectra changes of <b>NaHL</b> (2.5×10 <sup>-5</sup> mol L <sup>-1</sup> ) up addition of H <sup>+</sup> (4.0 eq, 1.0×10 <sup>-4</sup> mol L <sup>-1</sup> ) in ethanol, E <sub>x</sub> =2.5 nm. E <sub>m</sub> =2.5 nm..... | 15 |
| <b>Fig S24</b> (a) and (b) UV-vis spectra changes of <b>1</b> (2.5×10 <sup>-5</sup> mol L <sup>-1</sup> ) up addition of NH <sub>4</sub> <sup>+</sup> /HPO <sub>4</sub> <sup>2-</sup>                                                                                                                                                                                                                                   |    |

|                                                                                                                                                                                                                                                                                                                                                                                                                                                                                                                          |    |
|--------------------------------------------------------------------------------------------------------------------------------------------------------------------------------------------------------------------------------------------------------------------------------------------------------------------------------------------------------------------------------------------------------------------------------------------------------------------------------------------------------------------------|----|
| (0–4.5 equiv) in ethanol. (c) and (d) UV–vis spectra changes of <b>2</b> ( $2.5 \times 10^{-5}$ mol L <sup>-1</sup> ) up addition of NH <sub>4</sub> <sup>+</sup> /HPO <sub>4</sub> <sup>2-</sup> (0–4.5 equiv) in ethanol.....                                                                                                                                                                                                                                                                                          | 16 |
| <b>Fig S25</b> (a) and (b) UV–vis spectra changes of <b>1,2</b> ( $2.5 \times 10^{-5}$ mol L <sup>-1</sup> ) up addition of PO <sub>4</sub> <sup>3-</sup> (0–4.5 equiv) in ethanol. ....                                                                                                                                                                                                                                                                                                                                 | 16 |
| <b>Table S1</b> The pH values of <b>1</b> , <b>2</b> , NH <sub>4</sub> <sup>+</sup> , HPO <sub>4</sub> <sup>2-</sup> , and <b>1</b> or <b>2</b> with the addition of NH <sub>4</sub> <sup>+</sup> or HPO <sub>4</sub> <sup>2-</sup> in aqueous solution. (The concentration of the aqueous solution of <b>1</b> and <b>2</b> are $2.5 \times 10^{-5}$ mol L <sup>-1</sup> , and the concentration of NH <sub>4</sub> <sup>+</sup> and HPO <sub>4</sub> <sup>2-</sup> are $2.5 \times 10^{-5}$ mol L <sup>-1</sup> )..... | 17 |
| <b>Table S2</b> Selected bond distances (Å) and angles (°) for complex <b>1</b> . ....                                                                                                                                                                                                                                                                                                                                                                                                                                   | 17 |
| <b>Table S4.</b> Selected Hydrogen bond for complex <b>2</b> .....                                                                                                                                                                                                                                                                                                                                                                                                                                                       | 18 |
| <b>Table S5</b> Selected bond distances (Å) and angles (°) for complex <b>3</b> . ....                                                                                                                                                                                                                                                                                                                                                                                                                                   | 19 |
| <b>Table S6</b> Excited state atomic coordinate information of <b>NaHL</b> . ....                                                                                                                                                                                                                                                                                                                                                                                                                                        | 21 |
| <b>Table S7</b> Excited state atomic coordinate information of <b>1</b> . ....                                                                                                                                                                                                                                                                                                                                                                                                                                           | 21 |
| <b>Table S8</b> Excited state atomic coordinate information of <b>2</b> . ....                                                                                                                                                                                                                                                                                                                                                                                                                                           | 24 |
| <b>Table S9</b> Excited state atomic coordinate information of <b>3</b> . ....                                                                                                                                                                                                                                                                                                                                                                                                                                           | 26 |

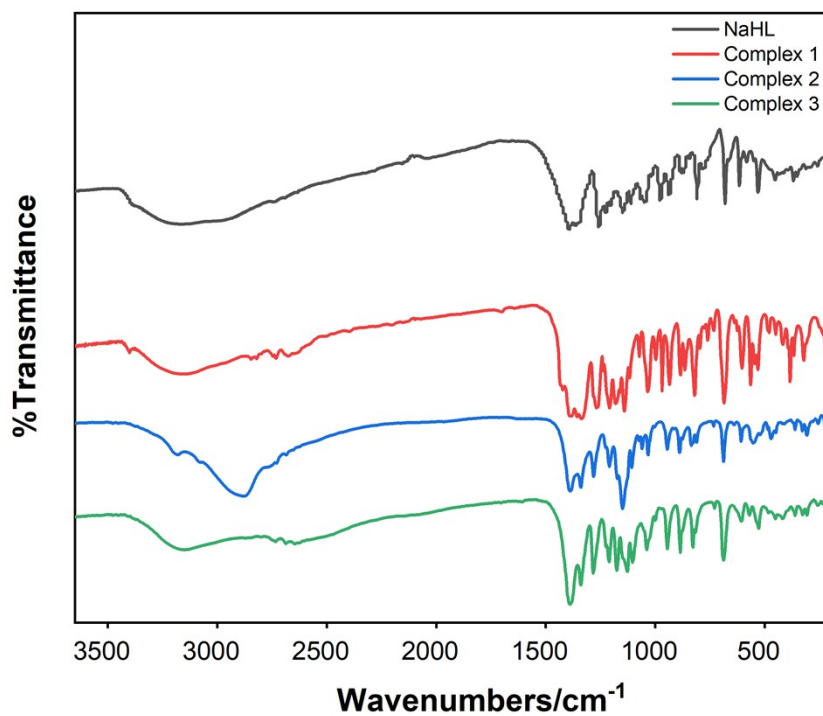

**Fig S1.** FT-IR spectra of NaHL, 1, 2, and 3.

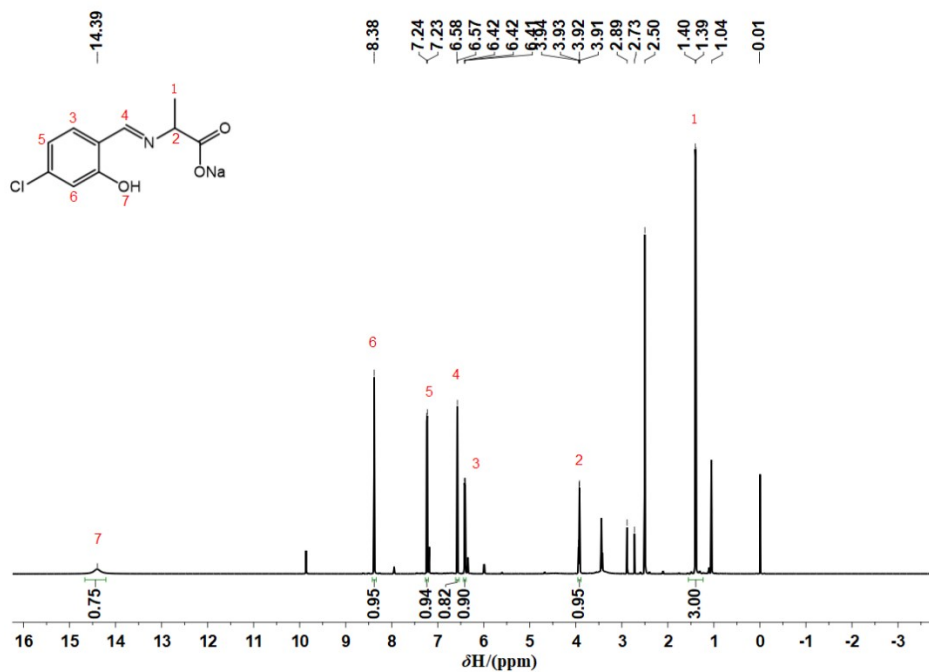

**Fig S2.**  $^1\text{H}$  NMR spectrum (700 MHz, 298K) of NaHL in  $\text{DMSO-}d_6$ .

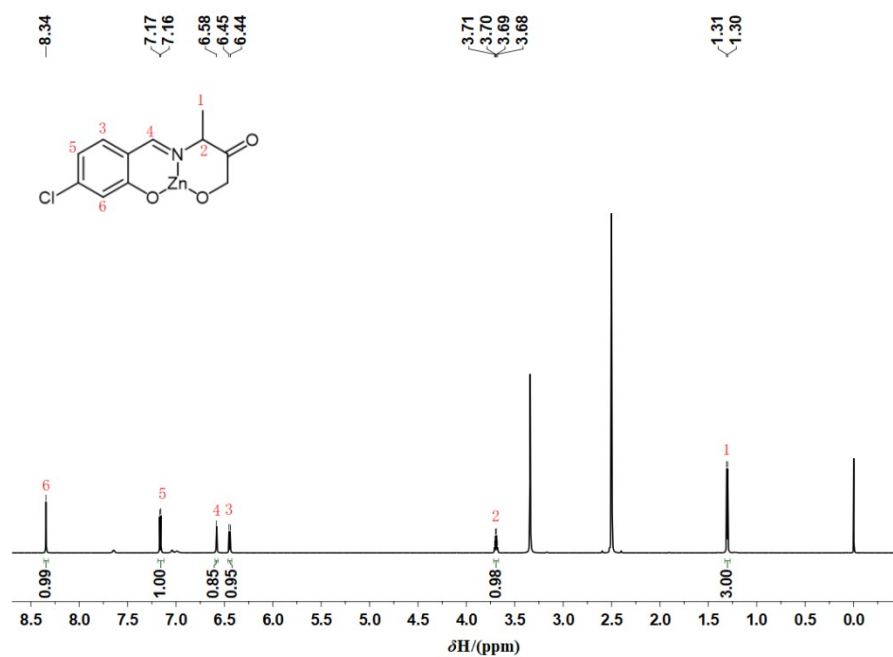

**Fig S3.** <sup>1</sup>H NMR spectrum (700 MHz, 298K) of **1** and **2** in DMSO-*d*<sub>6</sub>.

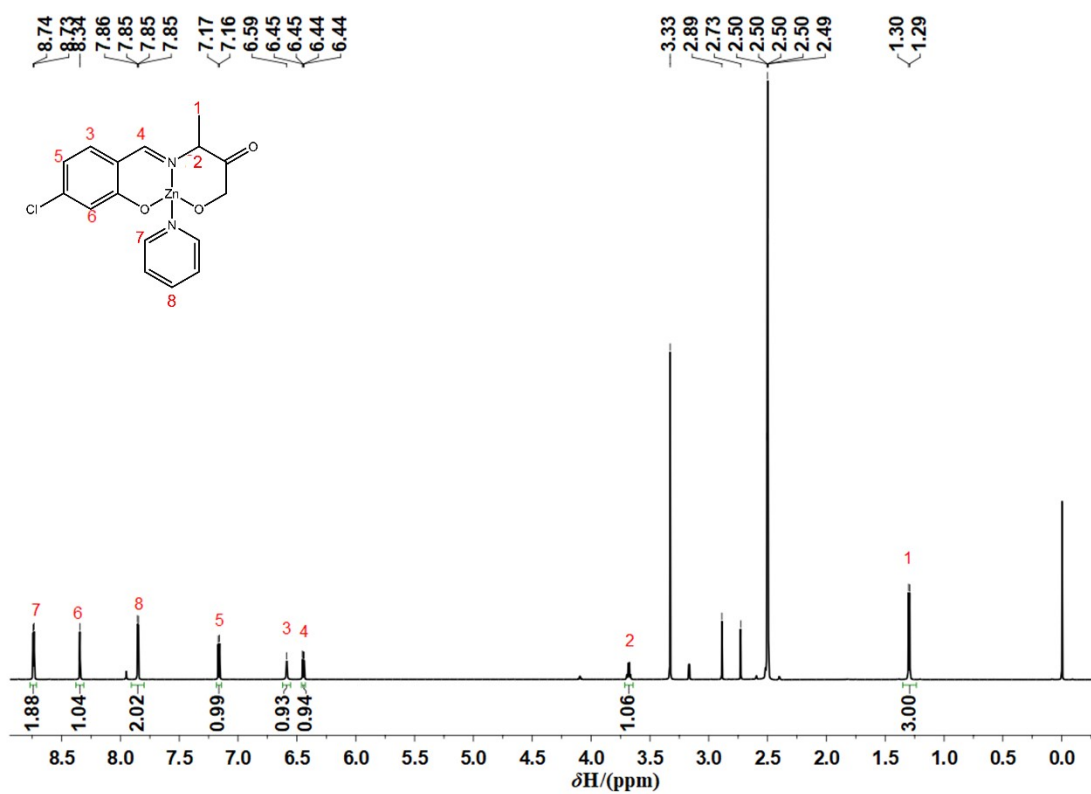

**Fig S4.** <sup>1</sup>H NMR spectrum (700 MHz, 298K) of **3** in DMSO-*d*<sub>6</sub>.

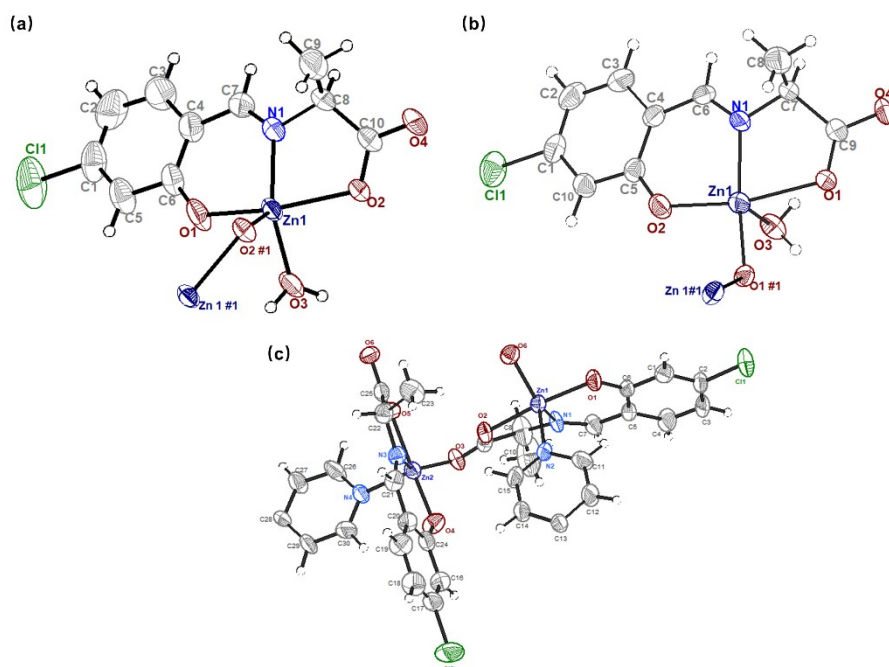

**Fig S5.** Oak Ridge thermal ellipsoid plot (ORTEP) views of **1** (a), **2** (b), and **3** (c) with 50% thermal ellipsoid probability.

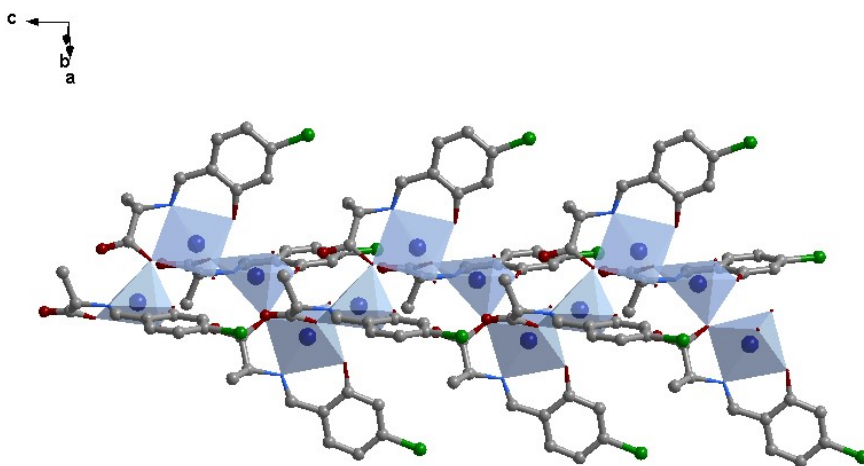

**Fig S6.** One-dimensional helix chain structure of **1**.

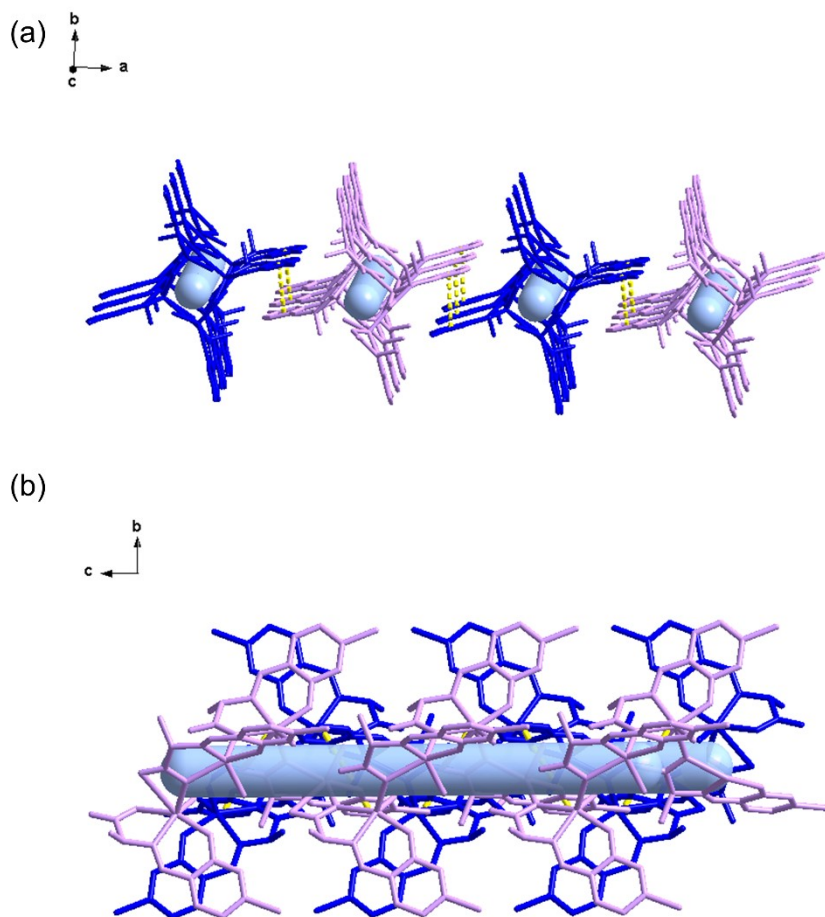

**Fig S7.** 2D structure of **1** viewed from *c* axis (a) and *a* axis (b).

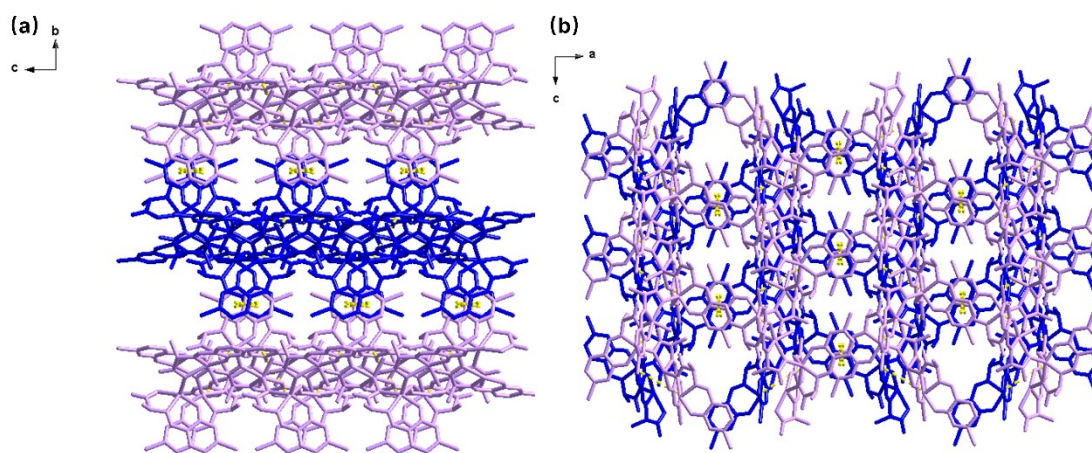

**Fig S8.** 3D structure of **1** viewed from *a* axis (a) and *b* axis (b).

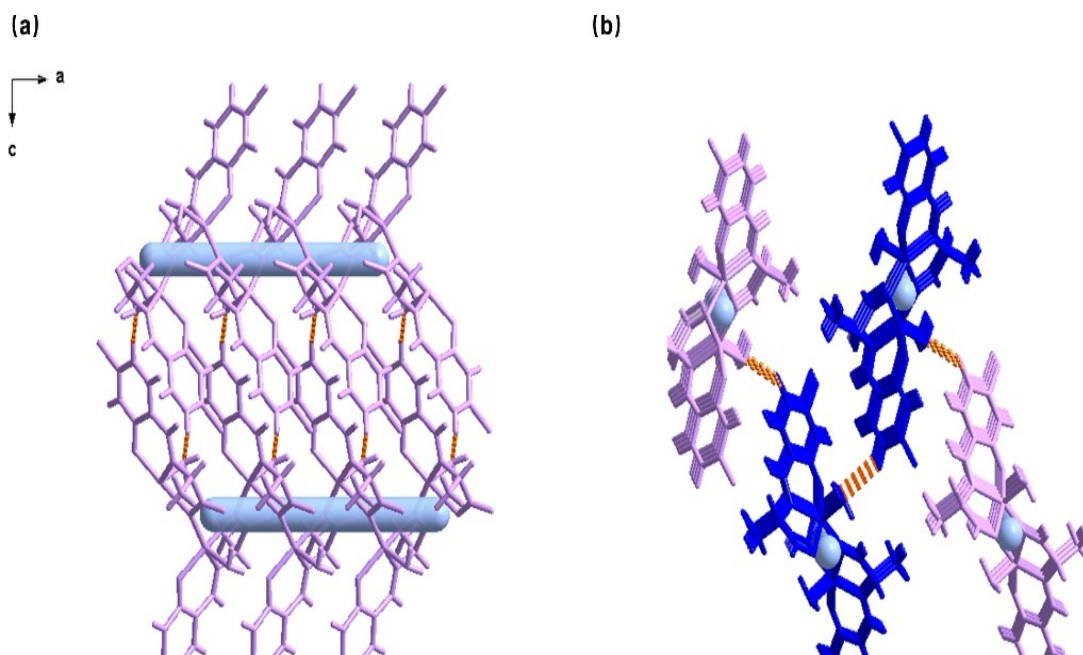

**Fig S9.** 2D structure of **2** viewed from *b* axis (a); 3D structure of **2** viewed from *a* axis (b).

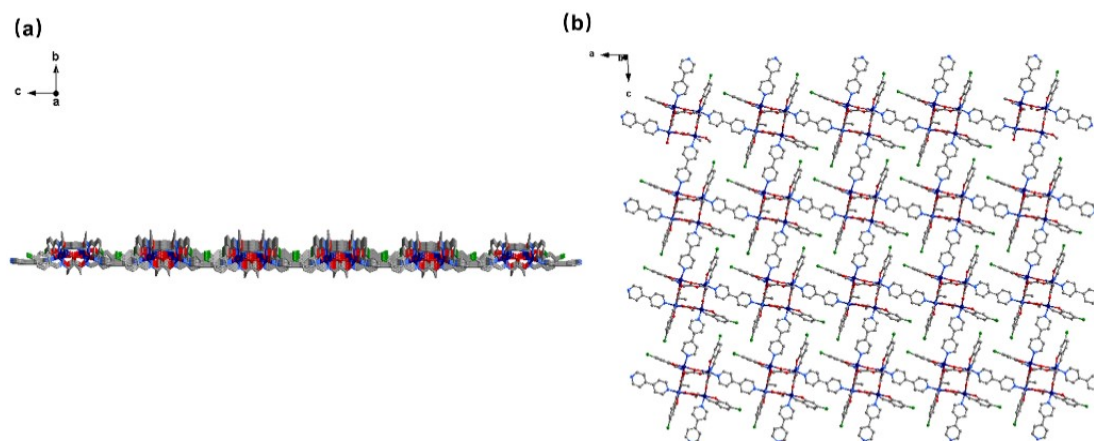

**Fig S10.** 2D structure of **3** viewed from *a* axis (a); 2D layered structure of **3** viewed from *b* axis (b).



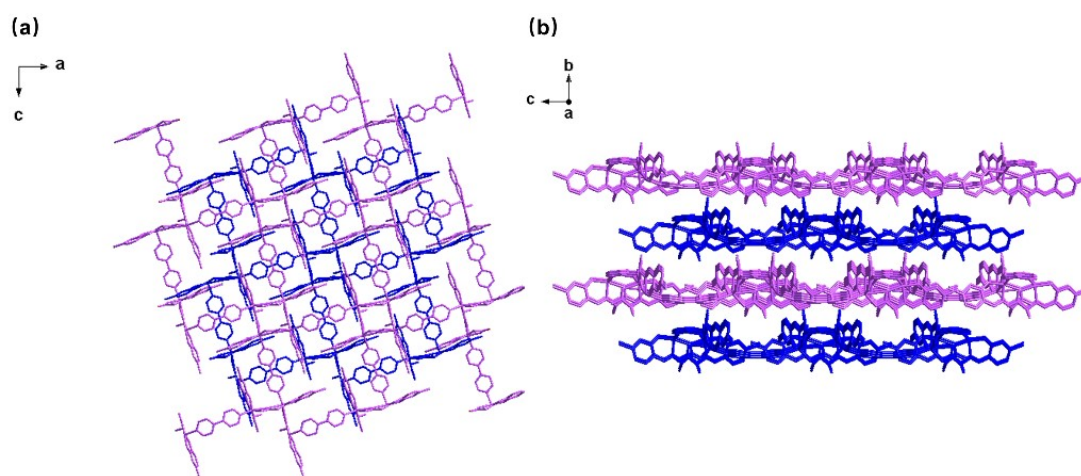

**Fig S11.** 3D structure of **3** viewed from *b* axis (a), from *c* axis (b).

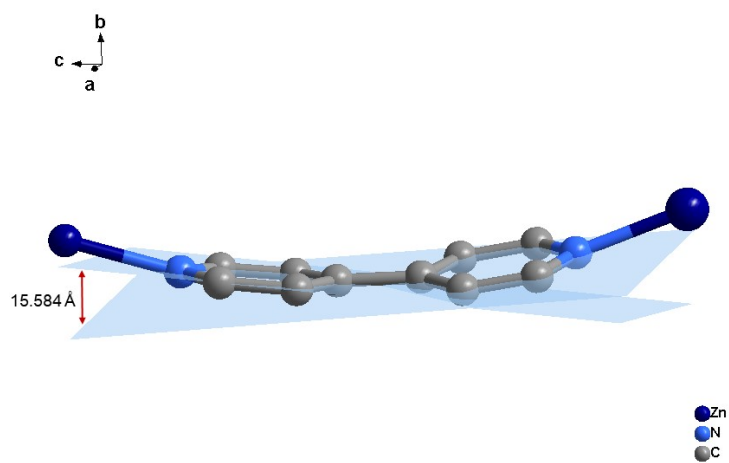

**Fig S12.** The bending angle between the pyridine ligand benzene ring and the benzene ring is 15.584°.

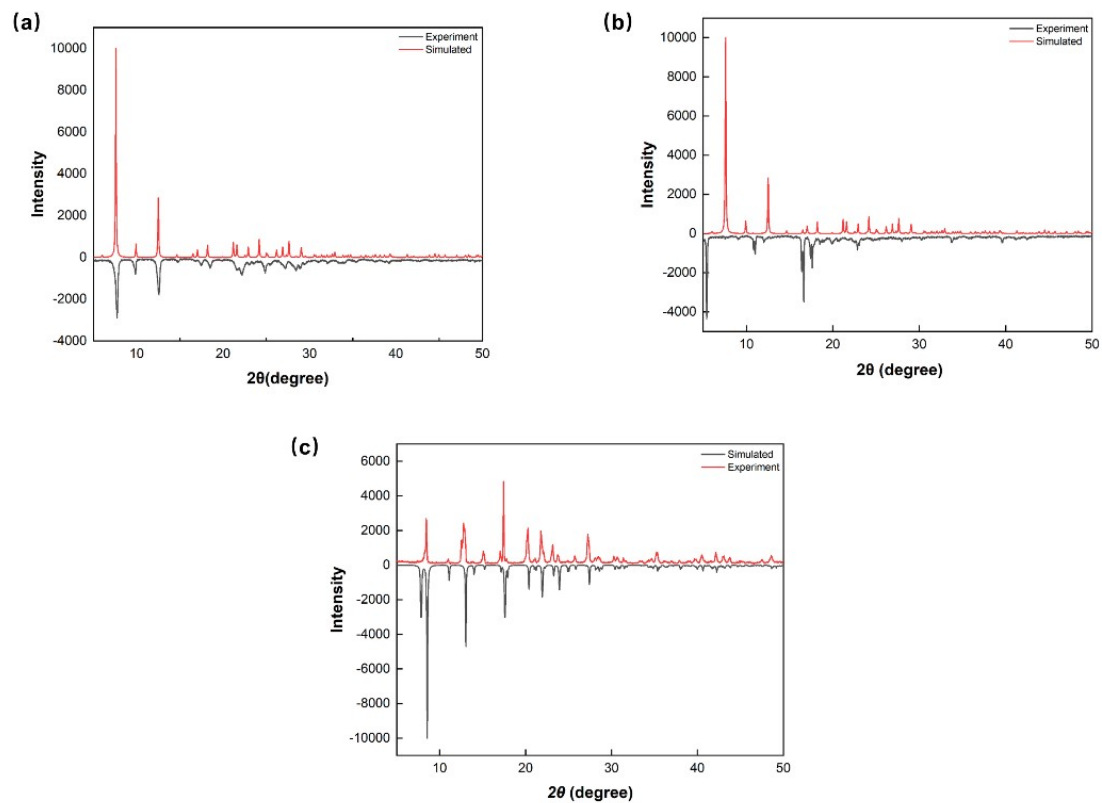

**Fig S13.** PXRD spectra of **1** (a), **2** (b) and **3** (c).

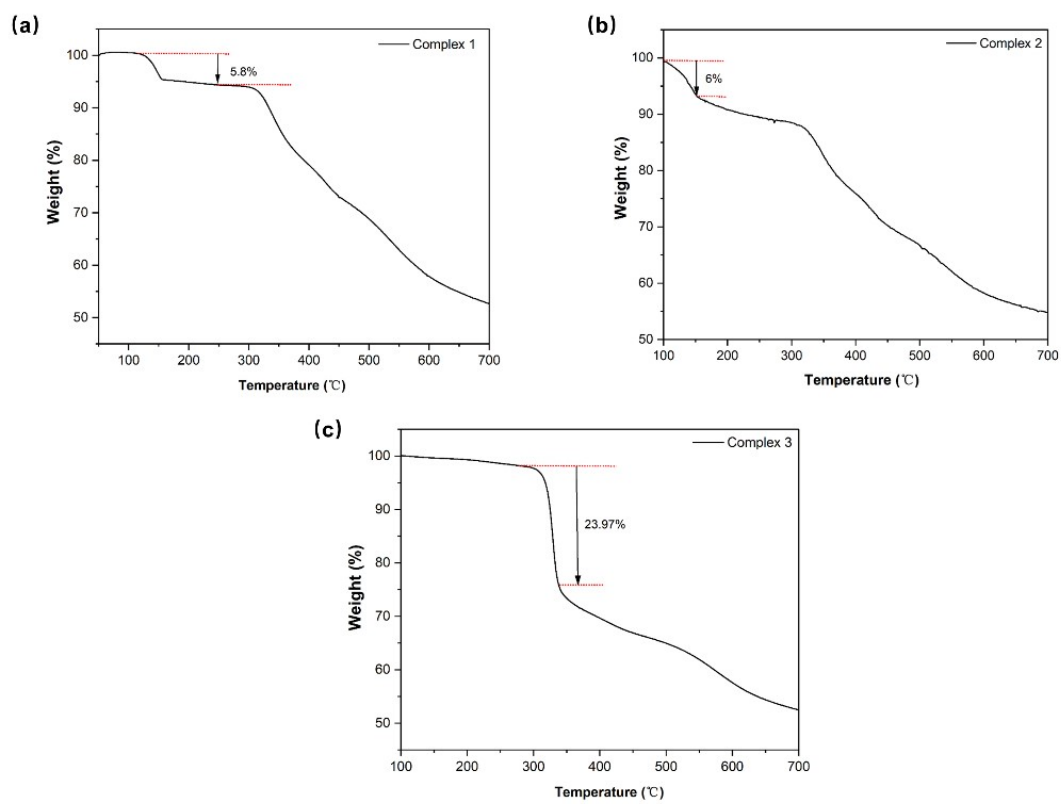

**Fig. S14.** TG curves of **1**, **2** and **3**. The losses of **1**, **2**, **3** in the first stage were 5.8%, 23.97 % and 6 % respectively.

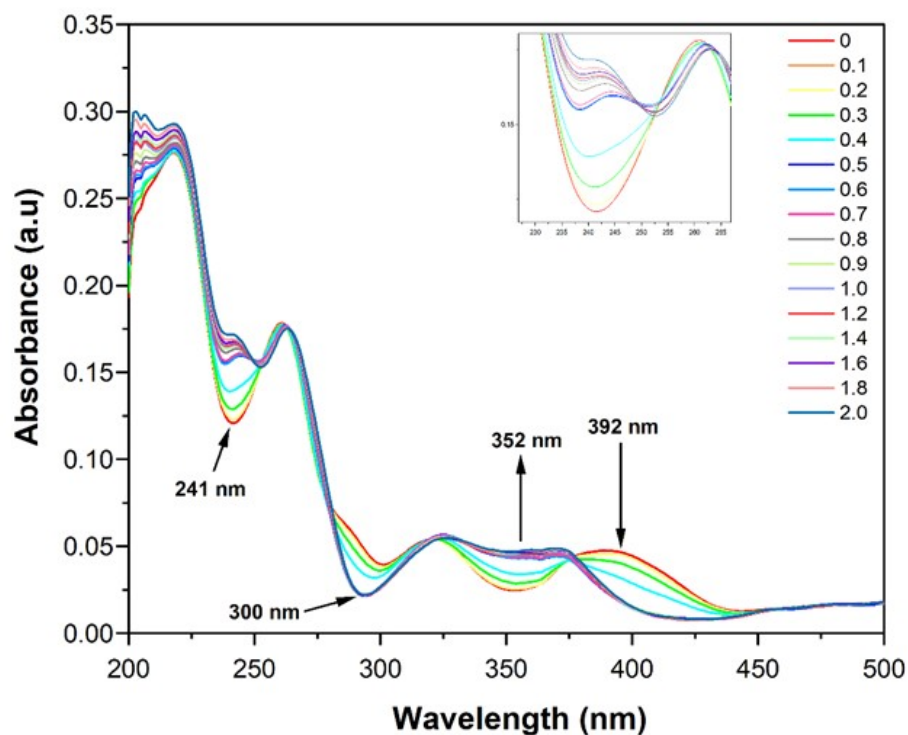

**Fig S15.** UV-vis spectra changes of NaHL ( $1 \times 10^{-5}$  mol L<sup>-1</sup>) after addition of Zn<sup>2+</sup> (0–2.0 equiv) in ethanol.

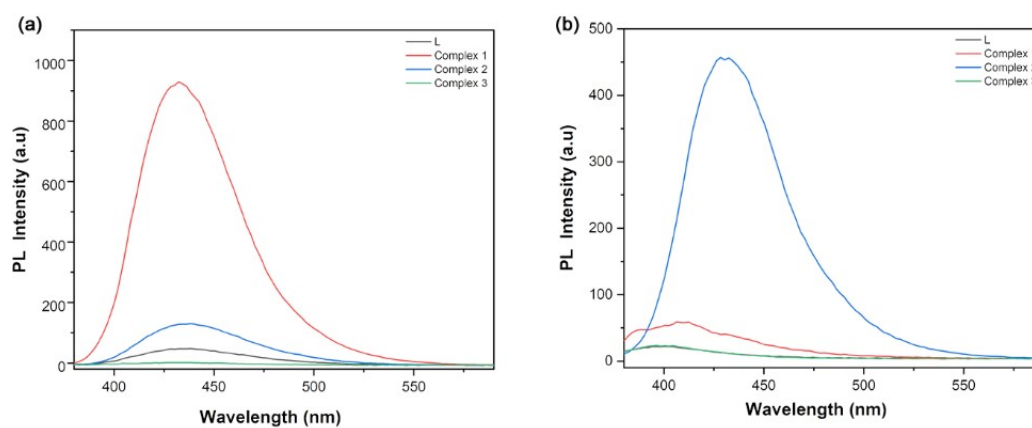

**Fig S16.** Fluorescence spectra of NaHL, **1**, **2**, and **3** in CH<sub>3</sub>CN (a) and CH<sub>2</sub>Cl<sub>2</sub> (b) ( $E_x = 360$  nm and concentration of  $2.5 \times 10^{-5}$  mol L<sup>-1</sup>).

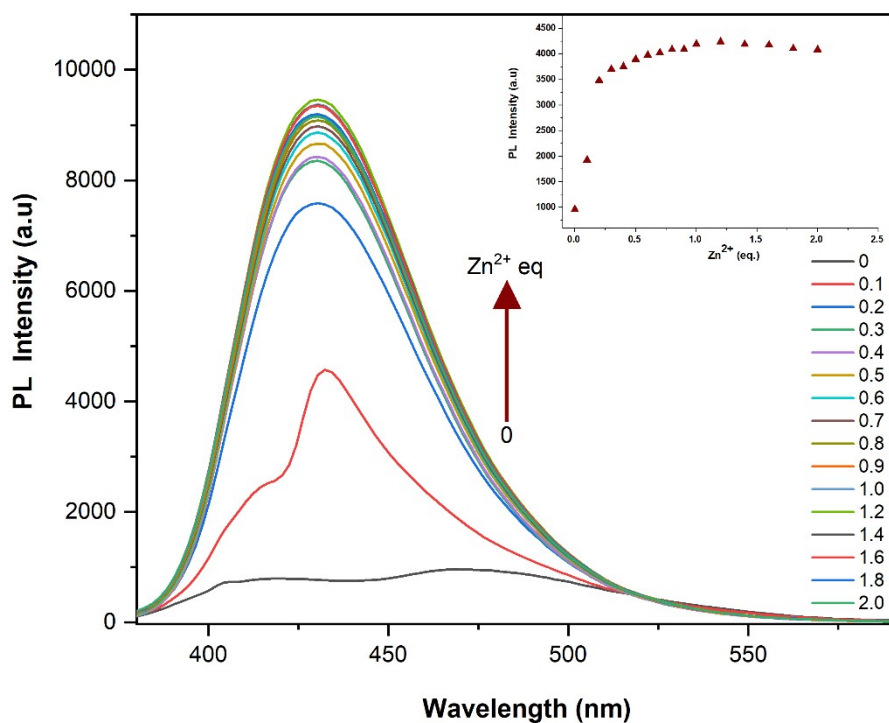

**Fig S17.** Fluorescence spectrum changes of **NaHL** (The concentration of  $2.5 \times 10^{-5}$  mol  $L^{-1}$ ) upon addition of  $Zn^{2+}$  (The concentration of  $2.5 \times 10^{-3}$  mol  $L^{-1}$ ) in ethanol (Ex = 360 nm, pass widths 2.5 nm).

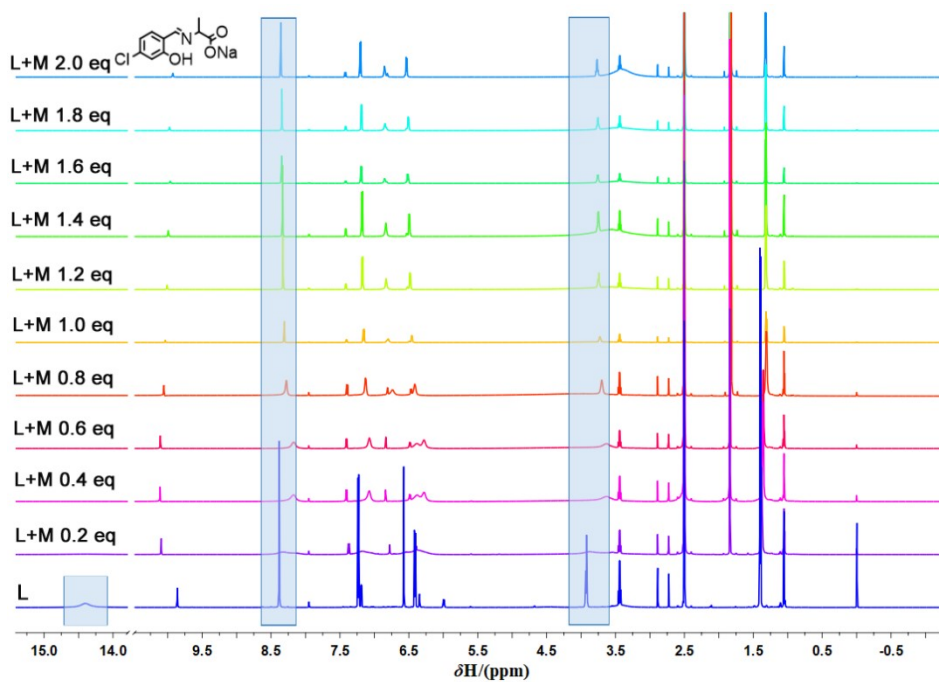

**Fig S18.**  $^1H$  NMR (DMSO- $d_6$ , 700 MHz) spectra changes of **NaHL** upon addition of  $Zn^{2+}$  (0–2 eq).

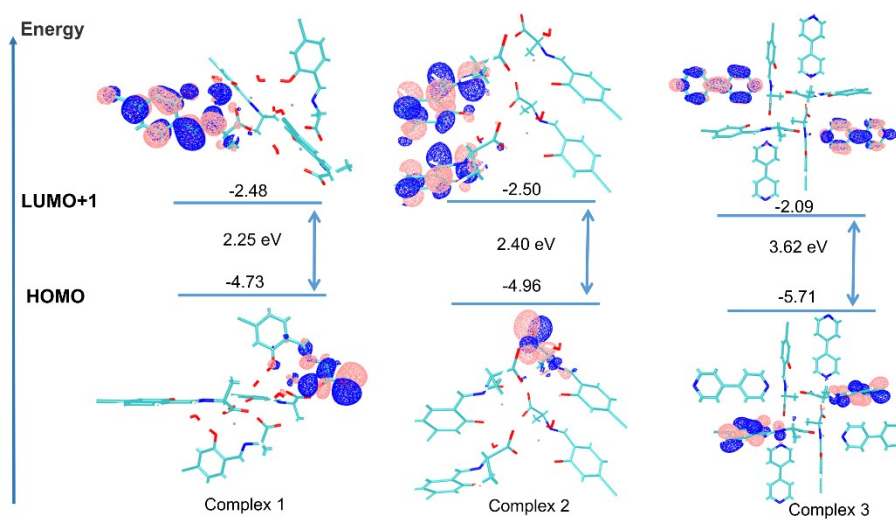

**Fig S19.** Primary orbitals which contribute to the calculated transitions of NaHL and complex 1-3 (iso=0.01).

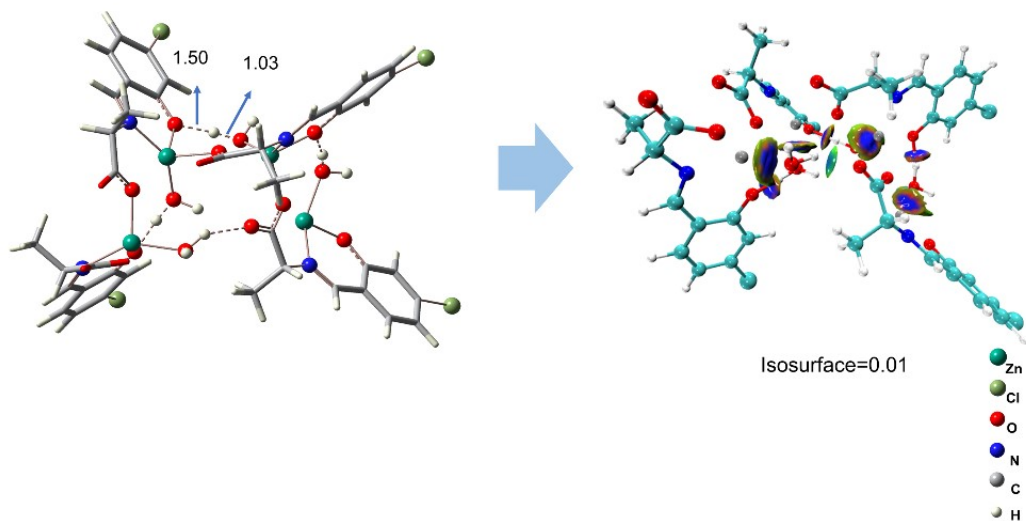

**Fig S20.** Optimized corresponding structure of complex 1 at the B3LYP(D3BJ)/6-31G(d)/SDD level (distances in Å) and the Color-filled (a) Reduced density gradient (RDG).

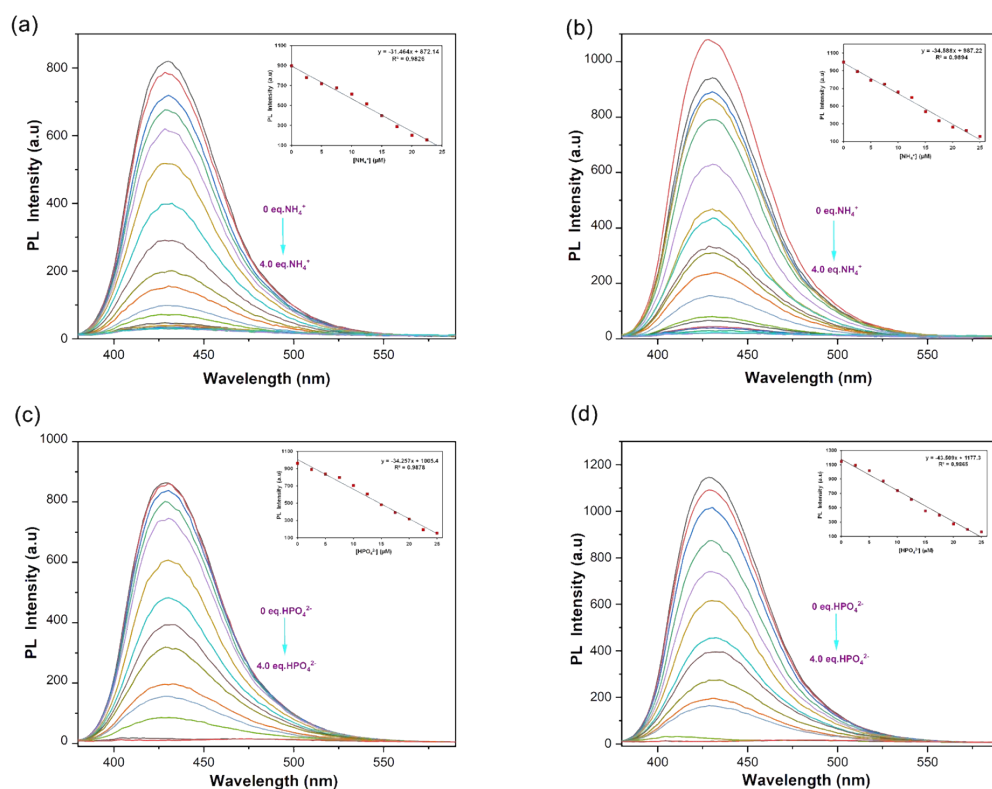

**Fig S21.** Fluorescence titration curves of complex **1** (a, c) and complex **2** (b, d) in the presence of different concentrations of NH<sub>4</sub><sup>+</sup>/HPO<sub>4</sub><sup>2-</sup>. The linear correlation for the 1/2 and NH<sub>4</sub><sup>+</sup>/HPO<sub>4</sub><sup>2-</sup> concentration at low concentration range (insert).

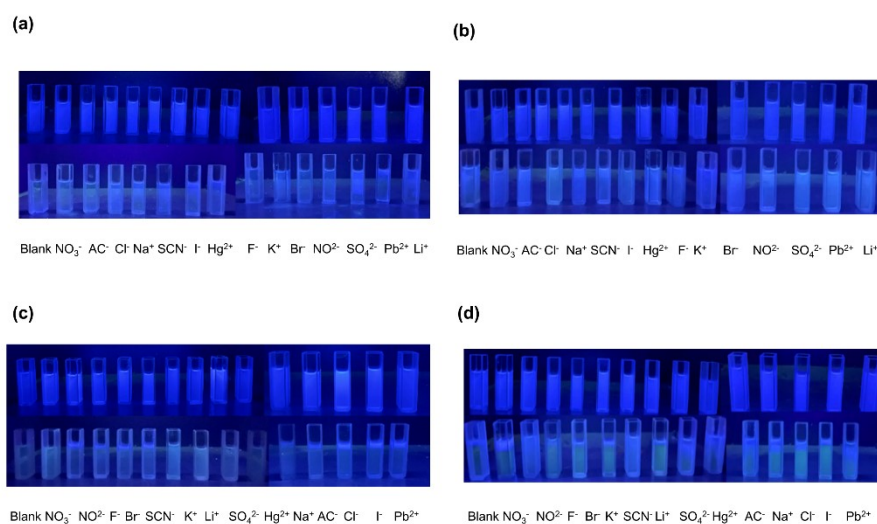

**Fig S22.** selectivity of NH<sub>4</sub><sup>+</sup>/HPO<sub>4</sub><sup>2-</sup> (4.0 equiv.) to other competing ions of **1** under UV lamp (365 nm) (a) and (b); (c) and (d) Selectivity of NH<sub>4</sub><sup>+</sup>/HPO<sub>4</sub><sup>2-</sup> (4.0 equiv.) to other competing ions of **2** under UV lamp (365 nm).

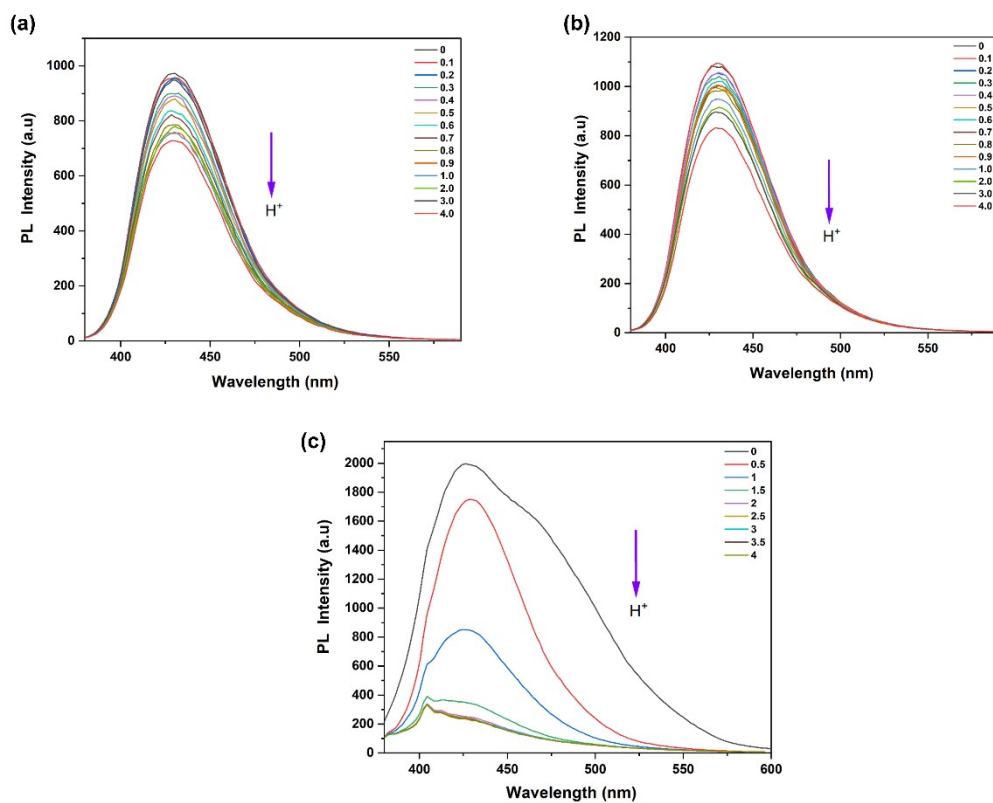

**Fig S23** (a) and (b) Fluorescence spectra changes of 1,2 ( $2.5 \times 10^{-5}$  mol L<sup>-1</sup>) up addition of H<sup>+</sup> (0–4.0 equiv) in ethanol. (c) Fluorescence spectra changes of NaHL ( $2.5 \times 10^{-5}$  mol L<sup>-1</sup>) up addition of H<sup>+</sup> (4.0 eq,  $1.0 \times 10^{-4}$  mol L<sup>-1</sup>) in ethanol, E<sub>x</sub>=2.5 nm. E<sub>m</sub>=2.5 nm.

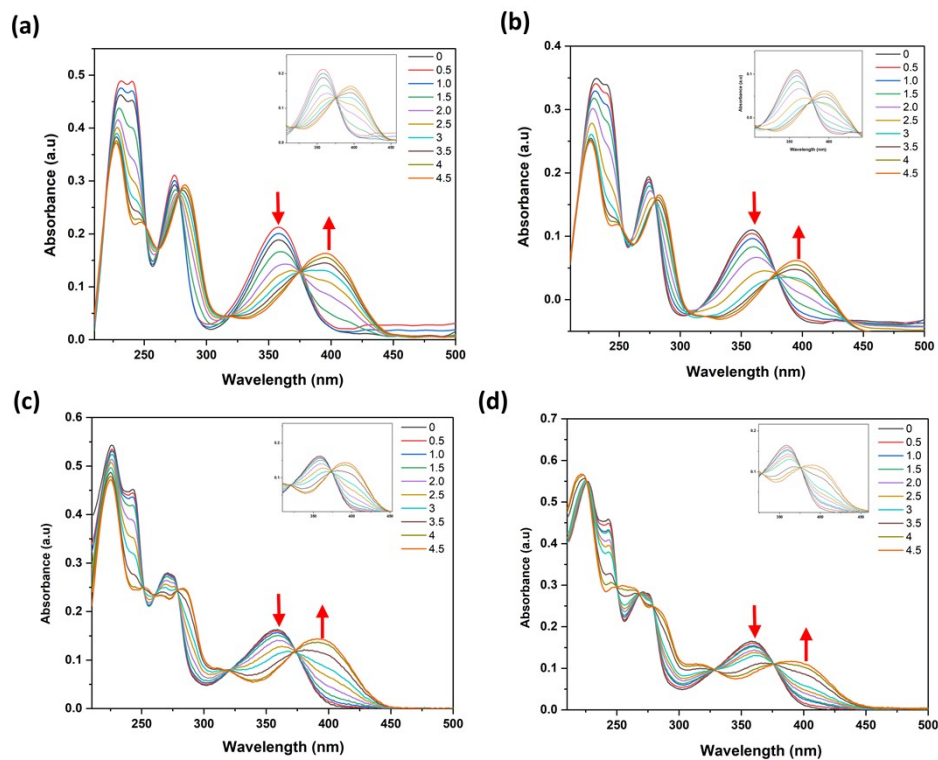

**Fig S24** (a) and (b) UV-vis spectra changes of **1** ( $2.5 \times 10^{-5} \text{ mol L}^{-1}$ ) up addition of  $\text{NH}_4^+/\text{HPO}_4^{2-}$  (0–4.5 equiv) in ethanol. (c) and (d) UV-vis spectra changes of **2** ( $2.5 \times 10^{-5} \text{ mol L}^{-1}$ ) up addition of  $\text{NH}_4^+/\text{HPO}_4^{2-}$  (0–4.5 equiv) in ethanol.

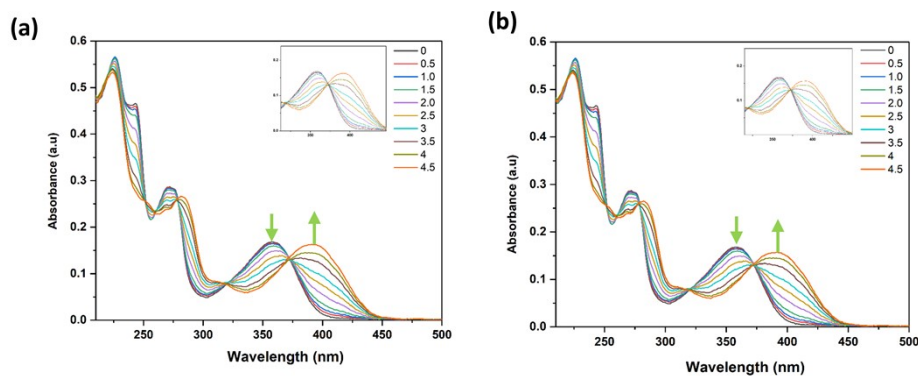

**Fig S25** (a) and (b) UV-vis spectra changes of **1** and **2** ( $2.5 \times 10^{-5} \text{ mol L}^{-1}$ ) up addition of  $\text{PO}_4^{3-}$  (0–4.5 equiv) in ethanol.



**Table S1** The pH values of **1**, **2**,  $\text{NH}_4^+$ ,  $\text{HPO}_4^{2-}$ , and **1** or **2** with the addition of  $\text{NH}_4^+$  or  $\text{HPO}_4^{2-}$  in aqueous solution. (The concentration of the aqueous solution of **1** and **2** are  $2.5 \times 10^{-5} \text{ mol L}^{-1}$ , and the concentration of  $\text{NH}_4^+$  and  $\text{HPO}_4^{2-}$  are  $2.5 \times 10^{-5} \text{ mol L}^{-1}$ ).

|    | <b>1</b> | <b>2</b> | $\text{NH}_4^+$ | $\text{HPO}_4^{2-}$ | 1+ $\text{NH}_4^+$ or $\text{HPO}_4^{2-}$ | 2+ $\text{NH}_4^+$ or $\text{HPO}_4^{2-}$ |
|----|----------|----------|-----------------|---------------------|-------------------------------------------|-------------------------------------------|
| pH | 6.10     | 6.15     | 5.98            | 7.09                | 5.1 or 5.45                               | 6.01 or 5.6                               |

**Table S2** Selected bond distances (Å) and angles (°) for complex **1**.

| Atom-Atom           | Length   | Atom-Atom | Length   |
|---------------------|----------|-----------|----------|
| Zn1-O1              | 1.997(3) | N1-C8     | 1.478(5) |
| Zn1-O3              | 2.005(3) | C10-C8    | 1.507(6) |
| Zn1-O2 <sup>1</sup> | 2.018(2) | C6-C4     | 1.398(6) |
| Zn1-N1              | 2.029(3) | C6-C5     | 1.416(5) |
| Zn1-O2 <sup>1</sup> | 2.187(2) | C8-C9     | 1.507(6) |
| C11-C1              | 1.743(5) | C4-C3     | 1.398(6) |
| O2-C10              | 1.300(4) | C4-C7     | 1.463(6) |
| O4-C10              | 1.216(5) | C5-C1     | 1.355(6) |
| O1-C6               | 1.300(5) | C3-C2     | 1.371(7) |
| N1-C7               | 1.265(5) | C1-C2     | 1.373(8) |

<sup>1</sup>5/4-Y, -1/4+X, -1/4+Z

| Atom-Atom-Atom           | Angle      | Atom-Atom-Atom | Angle    |
|--------------------------|------------|----------------|----------|
| O1-Zn1-O3                | 90.96(14)  | O4-C10-C8      | 119.5(3) |
| O1-Zn1-O2 <sup>1</sup>   | 94.30(11)  | O2-C10-C8      | 117.0(3) |
| O3-Zn1-O2 <sup>1</sup>   | 98.29(12)  | O1-C6-C4       | 123.8(3) |
| O1-Zn1-N1                | 88.70(12)  | O1-C6-C5       | 118.5(4) |
| O3-Zn1-N1                | 143.20(14) | C4-C6-C5       | 117.7(4) |
| O21-Zn1-N1               | 118.43(12) | N1-C8-C9       | 112.3(4) |
| O1-Zn1-O2                | 151.70(11) | N1-C8-C10      | 110.0(3) |
| O3-Zn1-O2                | 87.06(10)  | C9-C8-C10      | 111.8(4) |
| O21-Zn1-O2               | 113.93(12) | C6-C4-C3       | 118.8(4) |
| N1-Zn1-O2                | 76.48(11)  | C6-C4-C7       | 122.9(4) |
| C10-O2-Zn1 <sup>2</sup>  | 116.4(2)   | C3-C4-C7       | 118.3(4) |
| C10-O2-Zn1               | 113.2(2)   | N1-C7-C4       | 126.9(4) |
| Zn1 <sup>2</sup> -O2-Zn1 | 128.81(12) | C1-C5-C6       | 121.1(5) |
| C6-O1-Zn1                | 130.2(2)   | C2-C3-C4       | 122.6(5) |
| C7-N1-C8                 | 117.5(3)   | C5-C1-C2       | 121.9(5) |
| C7-N1-Zn1                | 126.4(3)   | C5-C1-C11      | 119.5(4) |
| C8-N1-Zn1                | 115.1(3)   | C2-C1-C11      | 118.6(4) |
| O4-C10-O2                | 123.4(4)   | C3-C2-C1       | 117.8(4) |

<sup>1</sup>5/4-Y, -1/4+X, -1/4+Z; <sup>2</sup>1/4+Y, 5/4-X, 1/4+Z

**Table S3.** Selected bond distances (Å) and angles (°) for complex **2**.

| Atom-Atom | Length/Å | Length/Å |
|-----------|----------|----------|
| Zn1-O1    | 2.280(3) | 1.466(4) |
| Zn1-O11   | 2.048(2) | 1.409(5) |
| Zn1-O2    | 2.000(2) | 1.425(5) |
| Zn1-O3    | 2.067(3) | 1.525(5) |
| Zn1-N1    | 2.025(3) | 1.432(5) |
| C11-C1    | 1.747(4) | 1.532(6) |
| O1-C9     | 1.276(5) | 1.384(5) |
| O2-C5     | 1.325(4) | 1.361(6) |
| O4-C9     | 1.243(5) | 1.418(5) |
| N1-C6     | 1.290(4) | 1.373(6) |

| Atom-Atom-Atom         | Angle      | Atom-Atom-Atom | Angle    |
|------------------------|------------|----------------|----------|
| O2-Zn1-O1              | 168.00(10) | C4-C5-C00D     | 117.7(3) |
| O2-Zn1-O1 <sup>1</sup> | 98.28(9)   | O4-C9-O1       | 124.4(4) |
| O3-Zn1-O1              | 87.23(10)  | C7-C9-O1       | 118.8(3) |
| O3-Zn1-O1 <sup>1</sup> | 99.54(11)  | C7-C9-O4       | 116.8(3) |
| O3-Zn1-O2              | 99.15(12)  | C4-C6-N1       | 127.4(4) |
| N1-Zn1-O1              | 77.56(10)  | C9-C7-N1       | 109.8(3) |
| N1-Zn1-O1 <sup>1</sup> | 156.99(11) | C8-C7-N1       | 111.1(3) |
| N1-Zn1-O2              | 91.31(11)  | C8-C7-C9       | 108.8(3) |
| N1-Zn1-O3              | 99.50(12)  | C00D-C1-C11    | 119.3(3) |
| C9-O1-Zn1              | 111.2(2)   | C2-C1-C11      | 118.7(3) |
| C9-O1-Zn1 <sup>2</sup> | 118.7(2)   | C2-C1-C00D     | 122.0(4) |
| C5-O2-Zn1              | 124.7(2)   | C1-C00D-C5     | 121.2(4) |
| C6-N1-Zn1              | 123.1(3)   | C6-C4-C5       | 124.5(3) |
| C7-N1-Zn1              | 118.0(2)   | C3-C4-C5       | 117.8(4) |
| C7-N1-C6               | 118.2(3)   | C3-C4-C6       | 117.7(4) |
| C00D-C5-O2             | 118.8(3)   | C2-C3-C4       | 123.1(4) |
| C4-C5-O2               | 123.4(3)   | C3-C2-C1       | 118.2(4) |

<sup>1</sup>-1/2+X,1/2-Y,1-Z; <sup>2</sup>1/2+X,1/2-Y,1-Z

**Table S4.** Selected Hydrogen bond for complex **2**.

|           | D-H  | H...A | D...A      | <(DHA) |
|-----------|------|-------|------------|--------|
| O3-H3D-O2 | 0.86 | 1.78  | 2.6261(16) | 168    |

**Table S5** Selected bond distances (Å) and angles (°) for complex **3**.

| Atom-Atom           | Length/Å  | Atom-Atom            | Length/Å  |
|---------------------|-----------|----------------------|-----------|
| Zn1-O1              | 2.007(5)  | N3-C22               | 1.473(10) |
| Zn1-O6              | 2.014(5)  | C24-C16              | 1.411(10) |
| Zn1-N1              | 2.077(7)  | C24-C20              | 1.423(12) |
| Zn1-O2              | 2.126(5)  | C6-C5                | 1.435(11) |
| Zn1-N2              | 2.134(6)  | C28-C27              | 1.350(10) |
| Zn2-O4 <sup>1</sup> | 1.988(5)  | C28-C29              | 1.370(10) |
| Zn2-O3              | 2.013(5)  | C28-C28 <sup>1</sup> | 1.515(14) |
| Zn2-N3 <sup>1</sup> | 2.047(7)  | C13-C14              | 1.343(10) |
| Zn2-O5 <sup>1</sup> | 2.116(5)  | C13-C12              | 1.385(10) |
| Zn2-N4              | 2.122(6)  | C13-C13 <sup>3</sup> | 1.503(14) |
| C11-C2              | 1.766(8)  | C14-C15              | 1.343(10) |
| C12-C17             | 1.749(8)  | C9-C8                | 1.556(11) |
| O2-C9               | 1.235(9)  | C7-C5                | 1.433(10) |
| O5-C25              | 1.247(9)  | C3-C4                | 1.355(11) |
| O1-C6               | 1.298(8)  | C3-C2                | 1.369(12) |
| O4-C24              | 1.306(8)  | C21-C20              | 1.416(11) |
| O3-C9               | 1.237(9)  | C12-C11              | 1.382(11) |
| O6-C25              | 1.270(9)  | C5-C4                | 1.395(10) |
| N2-C15              | 1.319(9)  | C27-C26              | 1.333(11) |
| N2-C11              | 1.359(10) | C16-C17              | 1.404(12) |
| N4-C30              | 1.312(9)  | C29-C30              | 1.368(11) |
| N4-C26              | 1.344(9)  | C23-C22              | 1.528(11) |
| N1-C7               | 1.271(9)  | C22-C25              | 1.529(10) |
| N1-C8               | 1.454(10) | C18-C17              | 1.355(14) |
| C1-C2               | 1.370(10) | C18-C19              | 1.357(12) |
| C1-C6               | 1.405(9)  | C19-C20              | 1.408(11) |
| N3-C21              | 1.276(9)  | C8-C10               | 1.441(15) |

<sup>1</sup>1-X,+Y,1-Z; <sup>2</sup>2-X,+Y,1-Z; <sup>3</sup>1-X,+Y,-Z

| Atom-Atom-Atom | Angle    | Atom-Atom-Atom           | Angle/   |
|----------------|----------|--------------------------|----------|
| O1-Zn1-O1      | 92.5(2)  | C27-C28-C29              | 115.9(7) |
| O1-Zn1-N1      | 89.8(2)  | C27-C28-C28 <sup>2</sup> | 123.1(8) |
| O6-Zn1-N1      | 135.3(2) | C29-C28-C28 <sup>2</sup> | 121.0(8) |
| O1-Zn1-O2      | 168.2(2) | C14-C13-C12              | 115.6(7) |
| O6-Zn1-O2      | 96.2(2)  | C14-C13-C13 <sup>3</sup> | 125.2(8) |
| N1-Zn1-O2      | 78.5(2)  | C12-C13-C13 <sup>3</sup> | 119.2(8) |
| O1-Zn1-N2      | 95.0(2)  | C15-C14-C13              | 122.8(7) |
| O6-Zn1-N2      | 112.1(2) | O2-C9-O3                 | 125.3(7) |
| N1-Zn1-N2      | 112.1(3) | O2-C9-C8                 | 117.7(7) |
| O2-Zn1-N2      | 89.0(2)  | O3-C9-C8                 | 116.9(7) |

|                                      |          |             |          |
|--------------------------------------|----------|-------------|----------|
| O4 <sup>1</sup> -Zn2-N2              | 97.0(2)  | N1-C7-C5    | 127.6(7) |
| O4 <sup>1</sup> -Zn2-N3 <sup>1</sup> | 90.2(2)  | N2-C15-C14  | 123.0(7) |
| O3-Zn2-N3 <sup>1</sup>               | 140.1(2) | C4-C3-C2    | 117.7(8) |
| O4 <sup>1</sup> -Zn2-O5 <sup>1</sup> | 168.7(2) | N3-C21-C20  | 127.8(8) |
| O3-Zn2-O5 <sup>1</sup>               | 90.3(2)  | C1-C2-C3    | 122.4(7) |
| N3 <sup>1</sup> -Zn2-O5 <sup>1</sup> | 78.7(2)  | C1-C2-C11   | 118.1(7) |
| O4 <sup>1</sup> -Zn2-N4              | 95.8(2)  | C3-C2-C11   | 119.5(6) |
| O3-Zn2-N4                            | 108.6(2) | C11-C12-C13 | 119.9(7) |
| N3 <sup>1</sup> -Zn2-N4              | 109.6(3) | C4-C5-C6    | 118.8(7) |
| O5 <sup>1</sup> -Zn2-N4              | 89.9(2)  | C4-C5-C7    | 117.7(7) |
| C9-O2-Zn1                            | 116.7(5) | C6-C5-C7    | 123.4(6) |
| C25-O5-Zn2 <sup>1</sup>              | 116.1(5) | C26-C27-C28 | 121.6(8) |
| C6-O1-Zn1                            | 127.0(5) | C3-C4-C5    | 123.3(8) |
| C24-O4-Zn2 <sup>1</sup>              | 127.1(5) | C27-C26-N4  | 123.8(7) |
| C9-O3-Zn2                            | 107.8(5) | C17-C16-C24 | 119.9(9) |
| C25-O6-Zn1                           | 106.6(5) | C30-C29-C28 | 118.9(7) |
| C15-N2-C11                           | 116.5(7) | N3-C22-C25  | 108.6(7) |
| C15-N2-Zn1                           | 124.4(5) | N3-C22-C23  | 110.9(6) |
| C11-N2-Zn1                           | 118.1(5) | C25-C22-C23 | 112.1(6) |
| C30-N4-C26                           | 114.2(7) | O5-C25-O6   | 123.2(7) |
| C30-N4-Zn2                           | 120.6(6) | O5-C5-C22   | 119.9(7) |
| C26-N4-Zn2                           | 123.1(5) | O6-C5-C22   | 116.8(7) |
| C7-N1-C8                             | 123.4(7) | C17-C18-C19 | 118.7(8) |
| C7-N1-Zn1                            | 123.7(5) | C18-C17-C16 | 122.2(8) |
| C8-N1-Zn1                            | 112.9(5) | C18-C17-C12 | 120.4(7) |
| C2-C1-C6                             | 121.2(7) | C16-C17-C12 | 117.3(8) |
| C21-N3-C22                           | 119.5(7) | C18-C19-C20 | 122.7(9) |
| C21-N3-Zn2 <sup>1</sup>              | 124.0(6) | C19-C20-C21 | 117.5(8) |
| C22-N3-Zn2 <sup>1</sup>              | 116.1(5) | C19-C20-C24 | 119.0(7) |
| O4-C24-C16                           | 117.9(7) | C21-C20-C24 | 123.5(7) |
| O4-C24-C20                           | 124.7(7) | N2-C11-C12  | 121.8(7) |
| C16-C24-C20                          | 117.4(7) | N4-C30-C29  | 125.2(8) |
| O1-C6-C1                             | 118.9(7) | C10-C8-N1   | 119.3(9) |
| O1-C6-C5                             | 124.7(6) | C10-C8-C9   | 115.3(8) |
| C1-C6-C5                             | 116.4(7) | N1-C8-C9    | 109.5(7) |

---

<sup>1</sup>1-X,+Y,1-Z; <sup>2</sup>-X,+Y,1-Z; <sup>3</sup>1-X,+Y,-Z

**Table S6** Excited state atomic coordinate information of **NaHL**.

| Atomic Number | Atomic Type | Coordinates (Angstroms) |          |          |
|---------------|-------------|-------------------------|----------|----------|
|               |             | X                       | Y        | Z        |
| 17            | 0           | 5.070608                | -0.23705 | 0.001405 |
| 1             | 0           | 2.865976                | -1.94539 | 0.530894 |
| 6             | 0           | 3.350652                | 0.042528 | -0.06406 |
| 6             | 0           | 2.499009                | -0.96173 | 0.253276 |
| 6             | 0           | 2.902041                | 1.289029 | -0.42843 |
| 6             | 0           | 1.096705                | -0.76295 | 0.239769 |
| 6             | 0           | 1.547378                | 1.494752 | -0.46435 |
| 1             | 0           | 3.599553                | 2.07883  | -0.6893  |
| 6             | 0           | 0.62416                 | 0.5041   | -0.11406 |
| 8             | 0           | 0.325063                | -1.76453 | 0.542285 |
| 1             | 0           | 1.163455                | 2.472302 | -0.75007 |
| 6             | 0           | -0.7981                 | 0.838107 | -0.15002 |
| 7             | 0           | -1.76571                | 0.07807  | 0.144067 |
| 1             | 0           | -0.98157                | 1.892226 | -0.43372 |
| 6             | 0           | -3.13297                | 0.623171 | 0.000948 |
| 6             | 0           | -3.59306                | 1.344966 | 1.241406 |
| 6             | 0           | -4.08554                | -0.47547 | -0.39181 |
| 1             | 0           | -3.16989                | 1.338926 | -0.84137 |
| 1             | 0           | -3.54864                | 0.679811 | 2.110431 |
| 1             | 0           | -4.61032                | 1.737206 | 1.14214  |
| 1             | 0           | -2.90934                | 2.178768 | 1.425091 |
| 8             | 0           | -5.25065                | -0.20762 | -0.61026 |
| 8             | 0           | -3.58756                | -1.66959 | -0.52701 |
| 1             | 0           | -0.60605                | -1.43449 | 0.497405 |

**Table S7** Excited state atomic coordinate information of **1**.

| Center Number | Atomic Number | Atomic Type | Coordinates (Angstroms) |          |          |
|---------------|---------------|-------------|-------------------------|----------|----------|
|               |               |             | X                       | Y        | Z        |
| 1             | 30            | 0           | 3.484359                | 1.447999 | 0.808895 |
| 2             | 30            | 0           | -2.1447                 | -1.44349 | 0.2266   |
| 3             | 30            | 0           | -4.03095                | 1.486082 | -1.27316 |
| 4             | 30            | 0           | 1.55096                 | -1.48237 | -0.62792 |
| 5             | 17            | 0           | -0.35535                | -5.06151 | 5.896847 |
| 6             | 17            | 0           | -2.37312                | 4.891554 | 4.566184 |
| 7             | 8             | 0           | 2.128738                | 0.450586 | -0.58753 |
| 8             | 8             | 0           | -3.8426                 | -0.44758 | -0.72516 |
| 9             | 8             | 0           | -0.58311                | -1.76304 | -1.01201 |
| 10            | 8             | 0           | 0.413423                | 0.957972 | -1.89551 |
| 11            | 8             | 0           | -1.98389                | -1.75622 | -2.72895 |
| 12            | 8             | 0           | -1.27934                | -2.33592 | 1.790347 |

---

|    |   |   |          |          |          |
|----|---|---|----------|----------|----------|
| 13 | 8 | 0 | -3.27527 | 2.199119 | 0.432784 |
| 14 | 8 | 0 | 3.394008 | -2.19484 | -0.3359  |
| 15 | 8 | 0 | 4.287636 | -0.35666 | 1.155833 |
| 16 | 8 | 0 | -1.60347 | 0.361487 | 0.913411 |
| 17 | 8 | 0 | -2.25865 | 1.700836 | -2.18715 |
| 18 | 8 | 0 | 1.123211 | -1.69683 | 1.319793 |
| 19 | 1 | 0 | -0.8111  | 0.663455 | 0.449979 |
| 20 | 1 | 0 | -1.45554 | 1.172958 | -2.03738 |
| 21 | 1 | 0 | 1.760972 | -2.26009 | 1.77545  |
| 22 | 7 | 0 | 3.181863 | 2.840259 | -0.63362 |
| 23 | 7 | 0 | -3.61735 | -2.83756 | 0.304909 |
| 24 | 7 | 0 | -5.76828 | 2.444693 | -0.85125 |
| 25 | 7 | 0 | 1.513547 | -2.44223 | -2.4149  |
| 26 | 6 | 0 | 1.417352 | 1.281007 | -1.29003 |
| 27 | 6 | 0 | -4.70543 | -1.27883 | -1.23184 |
| 28 | 6 | 0 | -0.86378 | -1.88743 | -2.2761  |
| 29 | 6 | 0 | -1.72195 | -3.27773 | 2.569751 |
| 30 | 6 | 0 | -3.75137 | 3.085447 | 1.255236 |
| 31 | 6 | 0 | 4.066483 | -3.08249 | -1.00689 |
| 32 | 6 | 0 | 1.917882 | 2.698955 | -1.38853 |
| 33 | 6 | 0 | -4.67061 | -2.69527 | -0.72218 |
| 34 | 6 | 0 | 0.2679   | -2.27107 | -3.19341 |
| 35 | 1 | 0 | 2.132802 | 2.857025 | -2.45485 |
| 36 | 1 | 0 | -5.64647 | -2.85675 | -0.24281 |
| 37 | 1 | 0 | -0.01803 | -3.24468 | -3.61517 |
| 38 | 6 | 0 | 5.354325 | 3.947933 | -0.50668 |
| 39 | 6 | 0 | -2.93468 | -3.94415 | 2.372118 |
| 40 | 6 | 0 | -5.01641 | 3.668622 | 1.123652 |
| 41 | 6 | 0 | 3.614854 | -3.66516 | -2.1945  |
| 42 | 6 | 0 | 4.03423  | 3.668135 | -1.07067 |
| 43 | 6 | 0 | -3.81859 | -3.66451 | 1.241211 |
| 44 | 6 | 0 | -5.94694 | 3.310576 | 0.055197 |
| 45 | 6 | 0 | 2.342249 | -3.30759 | -2.81987 |
| 46 | 1 | 0 | 3.759482 | 4.325188 | -1.90362 |
| 47 | 1 | 0 | -4.75233 | -4.24367 | 1.239541 |
| 48 | 1 | 0 | -6.8848  | 3.884589 | 0.059603 |
| 49 | 1 | 0 | 2.107536 | -3.87519 | -3.73041 |
| 50 | 6 | 0 | -0.9445  | -3.64622 | 3.694783 |
| 51 | 6 | 0 | -2.94475 | 3.503711 | 2.340476 |
| 52 | 6 | 0 | 5.32401  | -3.49982 | -0.50628 |
| 53 | 1 | 0 | -0.01032 | -3.1207  | 3.862965 |
| 54 | 1 | 0 | -1.96998 | 3.040685 | 2.454605 |
| 55 | 6 | 0 | -3.33292 | -4.90954 | 3.300549 |
| 56 | 6 | 0 | -5.40598 | 4.647438 | 2.041907 |

---

---

|     |    |   |          |          |          |
|-----|----|---|----------|----------|----------|
| 57  | 6  | 0 | 4.402445 | -4.64428 | -2.80847 |
| 58  | 1  | 0 | -4.28599 | -5.41227 | 3.149154 |
| 59  | 1  | 0 | -6.38563 | 5.106182 | 1.923822 |
| 60  | 1  | 0 | 4.037488 | -5.10487 | -3.72402 |
| 61  | 6  | 0 | -1.36208 | -4.61325 | 4.544999 |
| 62  | 6  | 0 | -3.38557 | 4.433167 | 3.22202  |
| 63  | 6  | 0 | 6.062374 | -4.4297  | -1.15796 |
| 64  | 6  | 0 | -2.55901 | -5.26681 | 4.374401 |
| 65  | 6  | 0 | -4.61838 | 5.026408 | 3.097743 |
| 66  | 6  | 0 | 5.625335 | -5.02281 | -2.3186  |
| 67  | 1  | 0 | -2.88312 | -6.03033 | 5.071178 |
| 68  | 1  | 0 | -4.9516  | 5.775157 | 3.806591 |
| 69  | 1  | 0 | 6.223835 | -5.77234 | -2.82198 |
| 70  | 6  | 0 | 0.874525 | 3.693259 | -0.94887 |
| 71  | 6  | 0 | -4.51327 | -3.69067 | -1.8437  |
| 72  | 6  | 0 | 0.430415 | -1.28576 | -4.3222  |
| 73  | 1  | 0 | -0.0519  | 3.546342 | -1.51169 |
| 74  | 1  | 0 | -0.52554 | -1.17618 | -4.83975 |
| 75  | 1  | 0 | 1.227677 | 4.715523 | -1.1126  |
| 76  | 1  | 0 | -4.59743 | -4.71585 | -1.46662 |
| 77  | 1  | 0 | 1.181315 | -1.63791 | -5.03706 |
| 78  | 1  | 0 | 0.652728 | 3.579747 | 0.118191 |
| 79  | 1  | 0 | -3.54501 | -3.5647  | -2.33545 |
| 80  | 1  | 0 | 0.735452 | -0.30696 | -3.94198 |
| 81  | 1  | 0 | 4.03737  | -1.13761 | 0.547851 |
| 82  | 1  | 0 | -2.28446 | 1.115143 | 0.809472 |
| 83  | 1  | 0 | -2.53314 | 1.548288 | -3.1075  |
| 84  | 1  | 0 | 0.182213 | -1.98468 | 1.597301 |
| 85  | 8  | 0 | 5.218786 | 2.340154 | 1.243368 |
| 86  | 8  | 0 | -4.95037 | 1.765228 | -3.23729 |
| 87  | 1  | 0 | 5.243377 | -0.33509 | 1.296057 |
| 88  | 6  | 0 | -6.84072 | 2.273028 | -1.85495 |
| 89  | 8  | 0 | -5.54818 | -0.95532 | -2.04552 |
| 90  | 6  | 0 | 6.148724 | 4.914354 | -1.13015 |
| 91  | 6  | 0 | 5.856662 | 3.281552 | 0.615221 |
| 92  | 1  | 0 | 5.676209 | -3.06174 | 0.421925 |
| 93  | 17 | 0 | 7.620623 | -4.88666 | -0.5251  |
| 94  | 1  | 0 | -5.29811 | -3.51411 | -2.58259 |
| 95  | 6  | 0 | -6.24417 | 1.889273 | -3.18368 |
| 96  | 1  | 0 | -7.32244 | 3.249776 | -2.00781 |
| 97  | 6  | 0 | -7.8896  | 1.287913 | -1.4059  |
| 98  | 1  | 0 | 5.75682  | 5.408312 | -2.01488 |
| 99  | 6  | 0 | 7.385586 | 5.271219 | -0.65866 |
| 100 | 6  | 0 | 7.143336 | 3.651322 | 1.077734 |

---

|     |    |   |          |          |          |
|-----|----|---|----------|----------|----------|
| 101 | 8  | 0 | -6.96965 | 1.757666 | -4.14976 |
| 102 | 1  | 0 | -8.62369 | 1.184827 | -2.20838 |
| 103 | 1  | 0 | -8.39412 | 1.628333 | -0.49353 |
| 104 | 1  | 0 | -7.44003 | 0.30703  | -1.22663 |
| 105 | 1  | 0 | 7.974364 | 6.038662 | -1.14726 |
| 106 | 6  | 0 | 7.859023 | 4.618035 | 0.454975 |
| 107 | 1  | 0 | 7.534385 | 3.128817 | 1.943462 |
| 108 | 17 | 0 | 9.424085 | 5.066844 | 1.080373 |

**Table S8** Excited state atomic coordinate information of **2**.

| Center Number | Atomic Number | Atomic Type | Coordinates (Angstroms) |          |          |
|---------------|---------------|-------------|-------------------------|----------|----------|
|               |               |             | X                       | Y        | Z        |
| 1             | 1             | 0           | 7.425689                | -0.01345 | 1.638865 |
| 2             | 1             | 0           | 5.261562                | 0.21     | 2.212194 |
| 3             | 1             | 0           | 2.735961                | -4.17802 | 2.529732 |
| 4             | 6             | 0           | 2.797309                | 0.732922 | 2.261079 |
| 5             | 6             | 0           | 0.284869                | -3.62307 | 2.599545 |
| 6             | 1             | 0           | 3.029277                | -0.31996 | 2.457122 |
| 7             | 1             | 0           | 0.512833                | -4.67394 | 2.806295 |
| 8             | 1             | 0           | 4.921268                | -4.36122 | 1.986822 |
| 9             | 6             | 0           | 2.775041                | 1.530197 | 3.568305 |
| 10            | 6             | 0           | 0.2626                  | -2.8258  | 3.906771 |
| 11            | 1             | 0           | 2.0329                  | 1.110675 | 4.253262 |
| 12            | 1             | 0           | -0.52236                | -3.21743 | 4.558353 |
| 13            | 1             | 0           | 3.757707                | 1.496417 | 4.048431 |
| 14            | 1             | 0           | 1.22562                 | -2.91838 | 4.420456 |
| 15            | 1             | 0           | 2.521388                | 2.575327 | 3.367188 |
| 16            | 1             | 0           | 0.081917                | -1.76877 | 3.698952 |
| 17            | 17            | 0           | 9.819642                | 2.363406 | -1.78604 |
| 18            | 8             | 0           | 4.918752                | 2.990147 | -0.70264 |
| 19            | 6             | 0           | 6.025377                | 2.313542 | -0.42291 |
| 20            | 6             | 0           | 8.395792                | 1.974391 | -0.85105 |
| 21            | 6             | 0           | 7.199052                | 2.601956 | -1.14749 |
| 22            | 1             | 0           | 7.134583                | 3.330783 | -1.94702 |
| 23            | 6             | 0           | 6.106218                | 1.335989 | 0.60977  |
| 24            | 6             | 0           | 7.366894                | 0.740204 | 0.85922  |
| 25            | 6             | 0           | 8.497558                | 1.050545 | 0.142606 |
| 26            | 1             | 0           | 9.440439                | 0.560825 | 0.355893 |
| 27            | 17            | 0           | -4.03997                | 7.658754 | 1.008496 |
| 28            | 1             | 0           | -1.83777                | 5.844551 | 1.22598  |
| 29            | 30            | 0           | 3.070049                | 2.39132  | -0.23154 |
| 30            | 30            | 0           | 0.557608                | -1.96467 | 0.106922 |
| 31            | 17            | 0           | 7.307202                | -1.99259 | -1.44757 |
| 32            | 8             | 0           | 1.151385                | 1.626646 | 0.734879 |



---

|    |    |   |          |          |          |
|----|----|---|----------|----------|----------|
| 33 | 8  | 0 | -1.36106 | -2.72935 | 1.073345 |
| 34 | 8  | 0 | 2.406312 | -1.36585 | -0.36417 |
| 35 | 8  | 0 | 2.84201  | 0.890722 | -1.63535 |
| 36 | 8  | 0 | 0.329569 | -3.46527 | -1.29688 |
| 37 | 8  | 0 | 0.591516 | -0.08453 | 2.046973 |
| 38 | 8  | 0 | -1.92093 | -4.44052 | 2.385439 |
| 39 | 7  | 0 | 3.770754 | 1.294298 | 1.319204 |
| 40 | 7  | 0 | 1.258314 | -3.0617  | 1.65767  |
| 41 | 6  | 0 | 3.512937 | -2.04245 | -0.08445 |
| 42 | 6  | 0 | 1.40152  | 0.76504  | 1.642082 |
| 43 | 6  | 0 | -1.11092 | -3.59095 | 1.980548 |
| 44 | 6  | 0 | 4.999605 | 0.911218 | 1.413127 |
| 45 | 6  | 0 | 2.487165 | -3.44478 | 1.751593 |
| 46 | 6  | 0 | 5.883353 | -2.3816  | -0.51258 |
| 47 | 6  | 0 | 4.686611 | -1.75404 | -0.80902 |
| 48 | 1  | 0 | 4.636848 | -1.01879 | -1.60428 |
| 49 | 6  | 0 | 3.593778 | -3.02001 | 0.948236 |
| 50 | 6  | 0 | 4.854454 | -3.61579 | 1.197686 |
| 51 | 6  | 0 | 5.985118 | -3.30545 | 0.481072 |
| 52 | 1  | 0 | 6.927828 | -3.79433 | 0.697535 |
| 53 | 1  | 0 | 2.239353 | 0.97998  | -2.38379 |
| 54 | 1  | 0 | -0.50175 | -3.11166 | -1.70668 |
| 55 | 1  | 0 | 2.625431 | 0.009076 | -1.18267 |
| 56 | 1  | 0 | 0.035513 | -4.30036 | -0.90073 |
| 57 | 30 | 0 | -0.72498 | 1.676022 | -0.0833  |
| 58 | 30 | 0 | -3.23742 | -2.67997 | 0.255163 |
| 59 | 17 | 0 | -6.55241 | 3.302759 | 1.346962 |
| 60 | 8  | 0 | -0.48353 | -0.46719 | -0.82378 |
| 61 | 8  | 0 | -2.99596 | -4.82319 | -0.48531 |
| 62 | 8  | 0 | -1.10733 | 3.619527 | 0.190249 |
| 63 | 8  | 0 | -3.61977 | -0.73647 | 0.528715 |
| 64 | 8  | 0 | -1.80934 | 0.901222 | 1.497301 |
| 65 | 8  | 0 | -4.32178 | -3.45477 | 1.835767 |
| 66 | 8  | 0 | -1.76427 | -1.94722 | -1.88791 |
| 67 | 7  | 0 | -2.12656 | 1.557896 | -1.53963 |
| 68 | 7  | 0 | -4.639   | -2.7981  | -1.20117 |
| 69 | 6  | 0 | -2.26571 | 4.206398 | -0.08251 |
| 70 | 6  | 0 | -4.77815 | -0.1496  | 0.25596  |
| 71 | 6  | 0 | -1.41252 | -0.78258 | -1.63953 |
| 72 | 6  | 0 | -3.92496 | -5.13857 | -1.30106 |
| 73 | 6  | 0 | -3.08105 | 2.416651 | -1.67052 |
| 74 | 6  | 0 | -5.59349 | -1.93934 | -1.33205 |
| 75 | 1  | 0 | -3.90403 | 2.16275  | -2.3508  |
| 76 | 1  | 0 | -6.40343 | -2.1767  | -2.03547 |

---

|     |   |   |          |          |          |
|-----|---|---|----------|----------|----------|
| 77  | 6 | 0 | -2.18372 | 0.332444 | -2.34267 |
| 78  | 6 | 0 | -4.69616 | -4.02355 | -2.0042  |
| 79  | 1 | 0 | -3.21493 | -0.02598 | -2.4361  |
| 80  | 1 | 0 | -5.73579 | -4.35368 | -2.11015 |
| 81  | 6 | 0 | -3.7216  | 6.131133 | 0.222427 |
| 82  | 6 | 0 | -6.23404 | 1.775138 | 0.560893 |
| 83  | 6 | 0 | -2.55902 | 5.444325 | 0.523474 |
| 84  | 6 | 0 | -5.07146 | 1.088331 | 0.86194  |
| 85  | 1 | 0 | -4.3548  | 1.50477  | 1.561484 |
| 86  | 6 | 0 | -3.21786 | 3.673293 | -0.99781 |
| 87  | 6 | 0 | -5.7303  | -0.6827  | -0.65934 |
| 88  | 6 | 0 | -4.38206 | 4.436347 | -1.26025 |
| 89  | 6 | 0 | -6.8945  | 0.080354 | -0.92179 |
| 90  | 1 | 0 | -5.11838 | 4.030521 | -1.95108 |
| 91  | 1 | 0 | -7.62189 | -0.32248 | -1.6234  |
| 92  | 6 | 0 | -4.63538 | 5.64712  | -0.66183 |
| 93  | 6 | 0 | -7.14782 | 1.291126 | -0.32337 |
| 94  | 1 | 0 | -5.54746 | 6.189619 | -0.88019 |
| 95  | 1 | 0 | -8.0558  | 1.839592 | -0.54614 |
| 96  | 6 | 0 | -1.57304 | 0.555342 | -3.72916 |
| 97  | 6 | 0 | -4.08548 | -3.80065 | -3.3907  |
| 98  | 1 | 0 | -1.57522 | -0.37703 | -4.30024 |
| 99  | 1 | 0 | -4.13275 | -4.61564 | -3.8965  |
| 100 | 1 | 0 | -2.14703 | 1.308031 | -4.27738 |
| 101 | 1 | 0 | -4.62954 | -3.00858 | -3.92146 |
| 102 | 1 | 0 | -0.54267 | 0.916729 | -3.63645 |
| 103 | 1 | 0 | -3.04793 | -3.47486 | -3.28488 |
| 104 | 1 | 0 | -1.13945 | 0.368979 | 1.965061 |
| 105 | 1 | 0 | -3.55122 | -3.9624  | 2.206741 |
| 106 | 1 | 0 | -2.50362 | 0.257172 | 1.176401 |
| 107 | 1 | 0 | -4.87327 | -4.14356 | 1.437813 |
| 108 | 8 | 0 | -4.27671 | -6.30321 | -1.54945 |

**Table S9** Excited state atomic coordinate information of **3**.

| Center Number | Atomic Number | Atomic Type | Coordinates (Angstroms) |          |          |
|---------------|---------------|-------------|-------------------------|----------|----------|
|               |               |             | X                       | Y        | Z        |
| 1             | 17            | 0           | -5.12021                | 8.355522 | -0.13771 |
| 2             | 7             | 0           | -1.12453                | 11.31618 | -1.19475 |
| 3             | 6             | 0           | -0.22587                | 8.6935   | -1.49466 |
| 4             | 6             | 0           | 0.586932                | 9.761343 | -1.55031 |
| 5             | 1             | 0           | 1.658117                | 9.629429 | -1.68397 |
| 6             | 6             | 0           | 0.14633                 | 11.01855 | -1.38204 |
| 7             | 1             | 0           | 0.841635                | 11.85562 | -1.39489 |
| 8             | 6             | 0           | -1.57945                | 8.974276 | -1.39697 |

---

|    |    |   |          |          |          |
|----|----|---|----------|----------|----------|
| 9  | 1  | 0 | -2.32586 | 8.187646 | -1.36875 |
| 10 | 6  | 0 | -1.99934 | 10.27639 | -1.21107 |
| 11 | 1  | 0 | -3.04831 | 10.51937 | -1.07426 |
| 12 | 30 | 0 | 1.832334 | 2.739654 | -0.51956 |
| 13 | 17 | 0 | 5.120207 | -8.35552 | -0.13771 |
| 14 | 8  | 0 | -0.14633 | 2.258973 | 0.090256 |
| 15 | 8  | 0 | 2.374733 | 0.127218 | -0.25034 |
| 16 | 8  | 0 | 3.776019 | 3.206563 | -0.68999 |
| 17 | 8  | 0 | 1.932543 | 1.392381 | -2.01302 |
| 18 | 7  | 0 | 1.124532 | 4.636621 | -1.19475 |
| 19 | 7  | 0 | 1.124525 | -11.3162 | -1.19475 |
| 20 | 6  | 0 | 5.835807 | 4.128093 | -0.11465 |
| 21 | 1  | 0 | 6.13303  | 4.033606 | -1.15312 |
| 22 | 7  | 0 | 3.003005 | -2.03093 | -1.63307 |
| 23 | 6  | 0 | 3.733068 | -4.58204 | -0.25848 |
| 24 | 6  | 0 | 0.22587  | 7.259292 | -1.49466 |
| 25 | 6  | 0 | 0.225866 | -8.6935  | -1.49466 |
| 26 | 6  | 0 | -0.58693 | 6.191458 | -1.55031 |
| 27 | 6  | 0 | -0.58693 | -9.76134 | -1.55031 |
| 28 | 1  | 0 | -1.65958 | 6.313139 | -1.67547 |
| 29 | 1  | 0 | -1.65812 | -9.62943 | -1.68397 |
| 30 | 6  | 0 | -0.14633 | 4.934245 | -1.38204 |
| 31 | 6  | 0 | -0.14633 | -11.0186 | -1.38204 |
| 32 | 1  | 0 | -0.83878 | 4.097142 | -1.36579 |
| 33 | 1  | 0 | -0.84164 | -11.8556 | -1.39489 |
| 34 | 6  | 0 | 3.554929 | -3.02693 | -2.20842 |
| 35 | 1  | 0 | 3.745296 | -2.95676 | -3.28925 |
| 36 | 6  | 0 | 1.579457 | 6.978532 | -1.39698 |
| 37 | 6  | 0 | 1.579448 | -8.97428 | -1.39697 |
| 38 | 1  | 0 | 2.330382 | 7.758843 | -1.3709  |
| 39 | 1  | 0 | 2.325862 | -8.18765 | -1.36875 |
| 40 | 6  | 0 | 1.344345 | -1.21305 | -3.27626 |
| 41 | 1  | 0 | 1.089852 | -0.34769 | -3.89177 |
| 42 | 1  | 0 | 1.556083 | -2.06185 | -3.93501 |
| 43 | 1  | 0 | 0.486308 | -1.46138 | -2.64424 |
| 44 | 6  | 0 | 2.574862 | -0.88537 | -2.42178 |
| 45 | 1  | 0 | 3.389306 | -0.5522  | -3.08247 |
| 46 | 6  | 0 | 2.266551 | 0.288785 | -1.48245 |
| 47 | 6  | 0 | 4.88941  | -6.45384 | -2.04152 |
| 48 | 1  | 0 | 5.351712 | -7.16615 | -2.71676 |
| 49 | 6  | 0 | 4.661962 | -6.78168 | -0.74563 |
| 50 | 6  | 0 | 4.533127 | -5.21807 | -2.47303 |
| 51 | 1  | 0 | 4.698325 | -4.94882 | -3.51319 |
| 52 | 6  | 0 | 3.925529 | -4.26574 | -1.63172 |

---

---

|    |    |   |          |          |          |
|----|----|---|----------|----------|----------|
| 53 | 6  | 0 | 1.99934  | 5.676407 | -1.21106 |
| 54 | 6  | 0 | 1.999341 | -10.2764 | -1.21107 |
| 55 | 1  | 0 | 3.043477 | 5.414373 | -1.08972 |
| 56 | 1  | 0 | 3.048305 | -10.5194 | -1.07426 |
| 57 | 30 | 0 | -1.83233 | -2.73965 | -0.51956 |
| 58 | 8  | 0 | 0.14633  | -2.25897 | 0.090256 |
| 59 | 8  | 0 | -2.37473 | -0.12722 | -0.25034 |
| 60 | 8  | 0 | -3.77602 | -3.20656 | -0.68999 |
| 61 | 8  | 0 | -1.93254 | -1.39238 | -2.01302 |
| 62 | 7  | 0 | -1.12453 | -4.63662 | -1.19475 |
| 63 | 6  | 0 | -5.83581 | -4.12809 | -0.11465 |
| 64 | 1  | 0 | -6.13303 | -4.03361 | -1.15312 |
| 65 | 7  | 0 | -3.00301 | 2.030932 | -1.63307 |
| 66 | 6  | 0 | -3.73307 | 4.582043 | -0.25848 |
| 67 | 6  | 0 | -0.22587 | -7.25929 | -1.49466 |
| 68 | 6  | 0 | 0.586929 | -6.19146 | -1.55031 |
| 69 | 1  | 0 | 1.659583 | -6.31314 | -1.67547 |
| 70 | 6  | 0 | 0.146328 | -4.93425 | -1.38204 |
| 71 | 1  | 0 | 0.838775 | -4.09714 | -1.36579 |
| 72 | 6  | 0 | -3.55493 | 3.026931 | -2.20842 |
| 73 | 1  | 0 | -3.7453  | 2.956758 | -3.28925 |
| 74 | 6  | 0 | -1.57946 | -6.97853 | -1.39698 |
| 75 | 1  | 0 | -2.33038 | -7.75884 | -1.3709  |
| 76 | 6  | 0 | -1.34435 | 1.21305  | -3.27626 |
| 77 | 1  | 0 | -1.08985 | 0.347691 | -3.89177 |
| 78 | 1  | 0 | -1.55608 | 2.061849 | -3.93501 |
| 79 | 1  | 0 | -0.48631 | 1.461376 | -2.64424 |
| 80 | 6  | 0 | -2.57486 | 0.885371 | -2.42178 |
| 81 | 1  | 0 | -3.38931 | 0.552195 | -3.08247 |
| 82 | 6  | 0 | -2.26655 | -0.28879 | -1.48245 |
| 83 | 6  | 0 | -4.88941 | 6.453838 | -2.04152 |
| 84 | 1  | 0 | -5.35171 | 7.166149 | -2.71676 |
| 85 | 6  | 0 | -4.66196 | 6.781679 | -0.74563 |
| 86 | 6  | 0 | -4.53313 | 5.218072 | -2.47303 |
| 87 | 1  | 0 | -4.69833 | 4.948818 | -3.51319 |
| 88 | 6  | 0 | -3.92553 | 4.265737 | -1.63172 |
| 89 | 6  | 0 | -1.99934 | -5.67641 | -1.21106 |
| 90 | 1  | 0 | -3.04348 | -5.41437 | -1.08972 |
| 91 | 17 | 0 | -8.26381 | -5.2333  | 0.277512 |
| 92 | 7  | 0 | -11.2549 | -1.31869 | 1.21649  |
| 93 | 6  | 0 | -8.66228 | -0.34848 | 1.572034 |
| 94 | 6  | 0 | -9.74701 | 0.455287 | 1.616841 |
| 95 | 1  | 0 | -9.63913 | 1.527008 | 1.760925 |
| 96 | 6  | 0 | -10.9749 | -0.01559 | 1.396995 |

---

---

|     |    |   |          |          |          |
|-----|----|---|----------|----------|----------|
| 97  | 1  | 0 | -11.831  | 0.655477 | 1.38221  |
| 98  | 6  | 0 | -8.91672 | -1.68961 | 1.452639 |
| 99  | 1  | 0 | -8.12638 | -2.43097 | 1.421211 |
| 100 | 6  | 0 | -10.2051 | -2.10203 | 1.257237 |
| 101 | 1  | 0 | -10.3976 | -3.16571 | 1.122784 |
| 102 | 30 | 0 | -2.81913 | 1.837619 | 0.396517 |
| 103 | 17 | 0 | 8.263811 | 5.233304 | 0.277512 |
| 104 | 8  | 0 | 3.209767 | -3.77399 | 0.623534 |
| 105 | 8  | 0 | -1.39334 | 1.706564 | 1.810863 |
| 106 | 7  | 0 | -4.65084 | 1.150456 | 1.216486 |
| 107 | 7  | 0 | 11.25487 | 1.318687 | 1.21649  |
| 108 | 7  | 0 | 2.037497 | 2.672882 | 1.546251 |
| 109 | 6  | 0 | 4.550626 | 3.682178 | 0.236805 |
| 110 | 6  | 0 | -7.24343 | 0.180246 | 1.572045 |
| 111 | 6  | 0 | 8.662277 | 0.348481 | 1.572034 |
| 112 | 6  | 0 | -0.31331 | 2.000368 | 1.287091 |
| 113 | 6  | 0 | 3.006177 | 3.203218 | 2.177248 |
| 114 | 1  | 0 | 2.978397 | 3.211167 | 3.274711 |
| 115 | 6  | 0 | 6.324114 | 4.820818 | 2.129749 |
| 116 | 1  | 0 | 7.00177  | 5.275379 | 2.843163 |
| 117 | 6  | 0 | 6.672446 | 4.688907 | 0.813509 |
| 118 | 6  | 0 | 4.203878 | 3.767852 | 1.626315 |
| 119 | 6  | 0 | -6.1587  | -0.62352 | 1.616848 |
| 120 | 6  | 0 | 9.747014 | -0.45529 | 1.616841 |
| 121 | 1  | 0 | -6.25659 | -1.6972  | 1.747311 |
| 122 | 1  | 0 | 9.639133 | -1.52701 | 1.760925 |
| 123 | 6  | 0 | 5.10573  | 4.36286  | 2.50834  |
| 124 | 1  | 0 | 4.822634 | 4.437114 | 3.557237 |
| 125 | 6  | 0 | -4.93077 | -0.15264 | 1.396994 |
| 126 | 6  | 0 | 10.97494 | 0.015593 | 1.396995 |
| 127 | 1  | 0 | -4.07805 | -0.82099 | 1.337058 |
| 128 | 1  | 0 | 11.83101 | -0.65548 | 1.38221  |
| 129 | 6  | 0 | 4.084586 | -5.88167 | 0.16353  |
| 130 | 1  | 0 | 3.915522 | -6.15407 | 1.198261 |
| 131 | 6  | 0 | -6.98899 | 1.521381 | 1.452649 |
| 132 | 6  | 0 | 8.916724 | 1.689606 | 1.452639 |
| 133 | 1  | 0 | -7.77351 | 2.267253 | 1.42007  |
| 134 | 1  | 0 | 8.126379 | 2.430972 | 1.421211 |
| 135 | 6  | 0 | -5.7006  | 1.933792 | 1.257234 |
| 136 | 6  | 0 | 10.20511 | 2.10203  | 1.257237 |
| 137 | 1  | 0 | -5.49641 | 2.993762 | 1.126213 |
| 138 | 1  | 0 | 10.39763 | 3.165707 | 1.122784 |
| 139 | 6  | 0 | 0.932869 | 1.982181 | 2.216009 |
| 140 | 1  | 0 | 1.215764 | 0.918349 | 2.248492 |

---

---

|     |    |   |          |          |          |
|-----|----|---|----------|----------|----------|
| 141 | 6  | 0 | 0.600596 | 2.459313 | 3.626595 |
| 142 | 1  | 0 | -0.30129 | 1.949218 | 3.967678 |
| 143 | 1  | 0 | 1.404462 | 2.234624 | 4.33434  |
| 144 | 1  | 0 | 0.409623 | 3.537888 | 3.639507 |
| 145 | 30 | 0 | 2.819125 | -1.83762 | 0.396517 |
| 146 | 8  | 0 | -3.20977 | 3.773986 | 0.623534 |
| 147 | 8  | 0 | 1.39334  | -1.70656 | 1.810863 |
| 148 | 7  | 0 | 4.650839 | -1.15046 | 1.216486 |
| 149 | 7  | 0 | -2.0375  | -2.67288 | 1.546251 |
| 150 | 6  | 0 | -4.55063 | -3.68218 | 0.236805 |
| 151 | 6  | 0 | 7.243428 | -0.18025 | 1.572045 |
| 152 | 6  | 0 | 0.313312 | -2.00037 | 1.287091 |
| 153 | 6  | 0 | -3.00618 | -3.20322 | 2.177248 |
| 154 | 1  | 0 | -2.9784  | -3.21117 | 3.274711 |
| 155 | 6  | 0 | -6.32411 | -4.82082 | 2.129749 |
| 156 | 1  | 0 | -7.00177 | -5.27538 | 2.843163 |
| 157 | 6  | 0 | -6.67245 | -4.68891 | 0.813509 |
| 158 | 6  | 0 | -4.20388 | -3.76785 | 1.626315 |
| 159 | 6  | 0 | 6.158696 | 0.623517 | 1.616848 |
| 160 | 1  | 0 | 6.256594 | 1.697201 | 1.747311 |
| 161 | 6  | 0 | -5.10573 | -4.36286 | 2.50834  |
| 162 | 1  | 0 | -4.82263 | -4.43711 | 3.557237 |
| 163 | 6  | 0 | 4.930774 | 0.152641 | 1.396994 |
| 164 | 1  | 0 | 4.078053 | 0.820991 | 1.337058 |
| 165 | 6  | 0 | -4.08459 | 5.881668 | 0.16353  |
| 166 | 1  | 0 | -3.91552 | 6.154072 | 1.198261 |
| 167 | 6  | 0 | 6.988994 | -1.52138 | 1.452649 |
| 168 | 1  | 0 | 7.77351  | -2.26725 | 1.42007  |
| 169 | 6  | 0 | 5.700599 | -1.93379 | 1.257234 |
| 170 | 1  | 0 | 5.496413 | -2.99376 | 1.126213 |
| 171 | 6  | 0 | -0.93287 | -1.98218 | 2.216009 |
| 172 | 1  | 0 | -1.21576 | -0.91835 | 2.248492 |
| 173 | 6  | 0 | -0.6006  | -2.45931 | 3.626595 |
| 174 | 1  | 0 | 0.301285 | -1.94922 | 3.967678 |
| 175 | 1  | 0 | -1.40446 | -2.23462 | 4.33434  |
| 176 | 1  | 0 | -0.40962 | -3.53789 | 3.639507 |

---
